# Supplementary material
Source: PubMed Central journal article supplement (PMC9107327)
Supplement: NIHMS1794204-supplement-Supplementary_material.pdf [file NIHMS1794204-supplement-Supplementary_material.pdf]

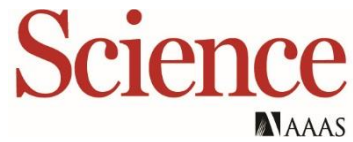

## Supplementary Materials for

### **Hyperexcitable arousal circuits drive sleep instability during aging**

Shi-Bin Li *et al.*

Corresponding author: Luis de Lecea, llecea@stanford.edu

*Science* **375**, eabh3021 (2022)  
DOI: 10.1126/science.abh3021

**The PDF file includes:**

Materials and Methods  
Supplementary Text  
Figs. S1 to S14

**Other Supplementary Material for this manuscript includes the following:**

MDAR Reproducibility Checklist

## **Materials and Methods**

### ***Animals***

Experiments with mice were performed following the protocols approved by the Stanford University Animal Care and Use Committee in accordance with the *National Institutes of Health Guide for the Care and Use of Laboratory Animals*. Discomfort, distress, and pain were minimized with anesthesia and analgesic medications. Mice were housed in a temperature- and humidity-controlled animal facility with a 12-h/12-h light/dark cycle (9 am light on, Zeitgeber time 0/ZT 0), unless otherwise specified. Mice had ad libitum access to standard laboratory mouse food pellets and water. 2-3 month young male adult wild type (WT) mice were acquired from Jackson Laboratory (Jax) and 18 month old WT male mice were acquired from National Institute on Aging (NIA). OX(Hcrt)-ataxin3 heterozygotes (15), Hcrt-IRES-Cre knock-in (Hcrt::Cre) heterozygotes (20), OX(Hcrt)-eGFP heterozygotes (29) and tyrosine hydroxylase (TH)-IRES-Cre knock-in (TH::Cre) heterozygotes (European Mouse Mutant Archive; EMMA ID: EM:00254) (49) were backcrossed onto C57BL/6J background. Male mice were used in the experiments, unless otherwise specified. Mice at an age younger than 5 months belonged to the young group, whereas mice older than 18 months were considered as aged. Animals from multiple litters were randomly assigned to control or experimental group under each experimental paradigm. Group sizes were determined based on earlier publications (13, 50, 51).

### ***EEG-EMG electrode preparation and implantation***

Mini-screw (US Micro Screw) was soldered to one tip of an insulated mini-wire with two tips exposed, and the other tip of the mini-wire was soldered to a golden pin aligned in an electrode socket. A micro-ring was made on one side of an insulated mini-wire with the other end soldered to a separate golden pin in the electrode socket. Each electrode socket contained 4 channels with 2 mini-screw channels for EEG recording and 2 micro-ring channels for EMG recording as described in earlier work from our lab (12, 47, 50). The resistance of all the channels was controlled with a digital Multimeter (Fluke) to be lower than 1.5 ohms for ideal conductance. Mice were mounted onto an animal stereotaxic frame (David Kopf Instruments) under anesthesia with intraperitoneal injection of a mixture of ketamine (100 mg/kg) and xylazine (20 mg/kg). Two

Li et al.

mini-screws were placed in the skull above the frontal (AP: -2 mm; ML:  $\pm$  1 mm) and temporal (AP: 3 mm, ML:  $\pm$  2.5 mm) cortices for EEG signal sampling and two micro-rings were placed in the neck muscles for EMG signal acquisition. Electrode socket was secured with Metabond (Parkell, Japan) and dental acrylic on skull for recording in freely moving mice. Buprenorphine SR (0.5 mg/kg) was administered subcutaneously to mice before and after surgery for pain relief. After surgery, revertidine (5 mg/kg) was administered (intraperitoneal) to mice to facilitate recovery from anesthesia.

### ***Virus injection with and without fiber optic implantation***

*Optogenetic experiments:* 0.3  $\mu$ l AAV-DJ-EF1 $\alpha$ -DIO-hChR2(H134R)-eYFP viruses (ChR2-eYFP,  $6.5 \times 10^{12}$  gc/ml, Stanford Virus Core, Lot no. 4176) was delivered to LH (AP: -1.35 mm, ML:  $\pm$  0.95 mm, DV: -5.15 mm) of anesthetized young (3 to 5 months) or aged (18 to 22 months) Hcrt::Cre mice with a 5  $\mu$ l Hamilton microsyringe according to stereotaxic coordinates determined on a Kopf stereotaxic frame. AAV-DJ-EF1 $\alpha$ -DIO-eYFP viruses (eYFP,  $6.9 \times 10^{12}$  gc/ml, Stanford Virus Core, Lot no. 3010) was used as control or for in vitro pharmacology experiments. A glass fiber (200  $\mu$ m core diameter, Doric Lenses, Franquet, Québec, Canada) was implanted with the tip right above the injection site for optogenetic stimulations later on. After fixing the glass fiber with Metabond, the EEG/EMG electrodes were implanted with dental acrylic fixation. Similar procedure was performed for virus injection in TH::Cre mice targeting LC NA neurons (AP: - 5.46 mm, ML:  $\pm$  1.2 mm, DV: - 3.6 mm). Mice were allowed to recover for at least 2 weeks to get sufficient virus expression before connecting to the EEG/EMG recording cables and optical stimulation patch cord. EEG/EMG electrode and fiber optic implantation were omitted in the mice infected with ChR2-eYFP or eYFP viruses used for in vitro electrophysiology experiments.

*Fiber photometry:* For fiber photometry, 0.3  $\mu$ l AAV vectors encoding GCaMP6f (AAV-DJ-EF1 $\alpha$ -DIO-GCaMP6f,  $1.1 \times 10^{12}$  gc/ml, Stanford Virus Core, Lot no. 3725) were delivered to LH (AP: - 1.35 mm, ML:  $\pm$  0.95 mm, DV: - 5.15 mm) of young (3 to 5 months) or aged (18 to 22 months) Hcrt::Cre mice with a 5  $\mu$ l Hamilton micro-syringe. A glass fiber (400  $\mu$ m core diameter, Doric Lenses) was implanted with the tip at the injection site for GCaMP6f signal acquisition afterwards. EEG/EMG electrodes were implanted following

Li et al.

fixation of fiber optic and secured with Metabond and dental acrylic. Mice were allowed to recover for at least 2 weeks to get sufficient virus expression before connecting to the EEG/EMG recording cables and fiber photometry recording patch cord.

*Single-nucleus RNA-sequencing (snRNA-seq)*: To label telomeres in the nuclei, 0.3  $\mu$ l AAV vectors encoding Cre-dependent DsRed-hTRF2 (52) (AAV-DJ-DIO-DsRed-hTRF2,  $1.95 \times 10^{12}$  gc/ml, customer viruses packaged at Stanford Virus Core, Lot no. 4422) were bilaterally injected to the LH (AP:  $-1.35$  mm, ML:  $\pm 0.95$  mm, DV:  $-5.15$  mm) of young (3 months) and aged (18 months) male and female Hcrt::Cre mice [3 mice per condition (young/aged male/female)].

### ***EEG-EMG recording and analysis***

Mice were singly-housed after surgery and allowed to recover for 1 week with access to food and water ad libitum before EEG/EMG recording. EEG/EMG signals were amplified through a multiple channel amplifier (Grass Instruments) and acquired with VitalRecorder (Kissei Comtec Co.) with a sampling frequency of 256 Hz followed by offline signal analysis. The bandpass was set between 0.1 and 120 Hz. Raw EEG/EMG data were exported to Matlab (MathWorks, Natick, MA, USA) and analyzed with custom scripts and Matlab built-in tools based on described criteria (12) to determine behavioral states. Cataplexy-like EEG/EMG pattern was determined based on the criteria described in the original publication reporting the OX(Hcrt)-ataxin3 narcolepsy mouse model (15) and the consensus definition of cataplexy in mouse models of narcolepsy: (i)  $\geq 10$  sec of EMG atonia; (ii) EEG with theta band domination; (iii) behavioral immobility preceded by  $\geq 40$  sec of wakefulness (30). For optogenetic and fiber photometry recording experiments, simultaneous EEG/EMG signals were recorded to determine behavioral states. The latency of sleep-to-wake transition and the duration of wakefulness following optogenetic stimulation during sleep were determined in SleepSign (Kissei Comtec Co.) with indication of stimulation timestamps on the raw EEG/EMG signals. EEG power spectral analysis was performed with the same method as described earlier (13). EEG band power calculation was based on: delta (1 to 4 Hz); theta (4 to 12 Hz). EEG band power comparison between vehicle- and KCNQ2/3 ligand-treated groups was conducted based on signals during 1 hour (for vehicle versus XE991)

Li et al.

and 3 hours (for vehicle versus flupirtine) following injection for wakefulness and NREM sleep based on the dynamic of drug's effect. As both XE991 and flupirtine postponed REM sleep onset, EEG band power was computed based on the initial REM sleep epoch after injection of vehicle/drug. The investigator was blind to the group information while conducting the EEG/EMG data analysis.

### ***In vivo optogenetic stimulation***

After recovery and sufficient virus expression (>2 weeks), mice injected with viruses expressing Cre-dependent ChR2-eYFP were connected to EEG/EMG recording cables and fiber optic patch cords (200  $\mu\text{m}$  core diameter, Doric Lenses) for one week acclimation in special cages with open top which allowed mice to move freely. Following acclimation, optogenetic stimulation with a range of frequencies (1, 5, 10, 15, and 20 Hz, controlled by A.M.P.I. Master 8) and a range of blue light (473 nm) intensities (1, 5, 10, 15, and 20 mW, Laserglow Technologies, calibrated with Thorlabs light meter) was performed. Each stimulation train consisted of 15 ms light pulses for 10 sec with a given light intensity and frequency according to a randomized 5 (light intensities)  $\times$  5 (frequencies) matrix generated in Matlab. Sleep-to-wake transition experiments were performed between ZT5-ZT9 of their inactive phase when mice have a strong sleep pressure. Light stimulations were delivered to mice within 30 sec of NREM or REM sleep onset to determine the latency of sleep-to-wake transition and duration of wake bout following optogenetic stimulation. The onset of light stimulation was time-stamped during recording for offline analysis afterwards.

### ***Fiber photometry signal acquisition and analysis***

After recovery, sufficient virus expression (>2 weeks), and habituation to EEG/EMG cable and fiber optic patch cord (400  $\mu\text{m}$  core diameter, Doric Lenses), mice injected with AAV viruses expressing Cre-dependent GCaMP6f were connected to EEG/EMG recording setup and a custom-built fiber photometry setup (50). Briefly, a 470 nm LED (M470D3, Thorlabs, NJ, USA) was sinusoidally modulated at 211 Hz and passed through a GFP excitation filter followed by a dichroic mirror (MD 498, ThorLabs) for reflection. The light stream was sent through a high NA (0.48), large core (400  $\mu\text{m}$ ) optical fiber patch cord (Doric Lenses, Québec, Canada), which was connected with a zirconia connector (Doric Lenses, Québec, Canada) to the dental

Li et al.

acrylic-secured fiber optic implant (0.48NA, 400  $\mu\text{m}$ , Doric Lenses, Québec, Canada) with the tip on the injection site. Separately, a 405 nm LED was modulated at 531 Hz and filtered by a 405 nm bandpass filter and sent through the optical fiber patch cord to mouse brain to evoke reference fluorescence, which was independent of  $\text{Ca}^{2+}$  release. GCaMP6f fluorescence and reference fluorescence were sampled by the same fiber patch cord through a GFP emission filter (MF525-39, ThorLabs), and center-aligned to a photodetector (Model 2151, Newport, Irvine, CA, USA) with a lens (LA1540-A, ThorLabs). The analog signals were amplified by two lock-in amplifiers for GFP fluorescence and reference fluorescence respectively (30 ms time constant, model SR380, Stanford Research Systems, Sunnyvale, CA, USA). Matlab-based custom software was used to control the LEDs and sample both the GFP fluorescence and reference fluorescence through a multifunction data acquisition device (National Instruments, Austin, TX, USA) with 256 Hz sampling frequency in a real-time manner.  $\Delta\text{F}/\text{F}$  was obtained by subtracting the reference fluorescence signal from the 470 nm excited GFP emission signal to remove the system interference. The optical fiber patch cord was photobleached to minimize autofluorescence prior to recording according to the user manual (Doric Lenses, Québec, Canada). The recording was conducted between ZT5-ZT9 of their inactive phase when mice have a strong sleep pressure.

To reveal the Hcrt neuronal activity in driving behavioral pattern changes, we used a bottom-up analysis strategy, i.e., GCaMP6f data were staged independent of simultaneous EEG/EMG signals. We then separated the increased GCaMP6f into two categories: GCaMP6f transients during sleep ( $G^S$ ) and GCaMP6f epochs associated with wakefulness ( $G^W$ ) (Fig. 1). All the  $G^S$  and  $G^W$  were staged from the same amount of recording conducted during ZT5-ZT9 from equal group size (1 hour/each mouse,  $n = 6$  mice each group) for comparison of Hcrt neuronal activity between young and aged mice. All the GCaMP  $\Delta\text{F}/\text{F}$  transients with a Z score  $>1\%$  (equals GCaMP6f  $\Delta\text{F}/\text{F}$  value  $\sim 0.3$ - $0.6$  for individual animal) of the highest  $\Delta\text{F}/\text{F}$  value of the entire trace were staged. After data staging, each GCaMP6f epoch was normalized to its own 5 sec baseline with time 0 defined for the beginning of GCaMP6f rising phase. Heatmaps were generated for each category based on 10 sec of normalized GCaMP6f epochs with 5 sec prior to and 5 sec after time 0. A Z score was calculated by

Li et al.

subtracting the mean value of GCaMP6f trace prior to time 0 from the mean value of GCaMP6f after time 0 and an averaged Z score based on each animal was used for statistical comparisons. As the  $G^S$  Z score was generally small, only the  $G^S$  transients with Z score  $> \text{mean}(G^S \text{ Z score}) - 3 \times \text{SEM}(G^S \text{ Z score})$  were included with ideal signal-to-noise ratio for subsequent analyses. By definition, all the  $G^W$  epochs were qualified for analyses.  $G^S$  scatter plot was generated with the duration of  $G^S$  against its peak value, and  $G^W$  scatter plot was generated with the duration of wake-associated  $G^W$  epoch against its maximum peak value (maximum GCaMP6f  $\Delta F/F$ , if given epoch appeared with multi-peaks). Animal-based frequencies of  $G^S$  and  $G^W$  were compared between the young and aged groups. Durations of sleep, wake, and S-W epochs were compared. Spearman correlation analysis with a linear fit was performed between  $G^W$  frequency (counts/hour) and mean sleep bout duration. The investigator was blind to the group information while conducting the GCaMP6f data staging.

### ***Chemical preparation and application***

XE991 dihydrochloride (Cat. no. 2000, referred to as XE991) and flupirtine maleate (Cat. no. 2867, referred to as flupirtine) were purchased from Tocris. XE991 was prepared in saline with a concentration of 50  $\mu\text{M}$  for in vitro electrophysiology and prepared in saline with a concentration of 0.2 mg/ml for in vivo experiment with a dosage of 2 mg/kg (0.1 ml/10g, intraperitoneally). 5 mM flupirtine stock solution (0.9% saline containing 0.3% dimethyl sulfoxide/DMSO, v/v) was added to artificial cerebrospinal fluid (ACSF) to reach a concentration of 50  $\mu\text{M}$  for in vitro electrophysiology. Flupirtine was prepared at a concentration of 2 mg/ml in 0.9% saline containing 0.3% DMSO (v/v, vehicle) for in vivo experiments with a dosage of 20 mg/kg (0.1 ml/10g, intraperitoneally). Flupirtine solution was ultrasonicated prior to application. Counterbalanced crossover design was used for in vivo pharmacology experiments to reveal the drug's effect. Two rounds of drug administrations were separated by at least one week for a complete wash-out of drug's effect. 4-Aminopyridine (4-AP) was purchased from Sigma-Aldrich (Cat. no. 275875). 100 mM 4-AP stock solution (0.9% sodium chloride/saline as vehicle) was added to ACSF to reach a concentration of 50  $\mu\text{M}$  for in vitro electrophysiology of  $I_M$  experiment. MK6096 (Merck) was prepared at a concentration of 2 mg/ml in a mixture

Li et al.

(v/v, vehicle) of 50% 0.9% saline and 50% Poly ethylene glycol (average Mn 400, PEG400, Sigma-Aldrich Cat. no. 202398) for in vivo pharmacology experiment as previously described (13).

### ***In vitro electrophysiology***

All the in vitro electrophysiology experiments were performed during the light phase (ZT3-ZT9). 3-9 mice were used each group. Slices were randomly assigned to groups examining effects of XE991 or flupirtine on M current in the in vitro pharmacology experiments.

*Slice preparation:* Mice from both groups were decapitated after anesthesia with sevoflurane or perfused with ice-cold slicing solution under anesthesia. To increase the chances of acquiring a healthy slice, we used a sucrose-based or choline-based ACSF for brain slice preparation to reduce the cell excitotoxicity and loss during slice preparation (53). After decapitation, the brain was rapidly dissected and immersed in ice-cold sucrose/choline-based ACSF slicing solution (pH 7.4, 95% O<sub>2</sub> / 5% CO<sub>2</sub>). 300 μm-thick coronal brain slices containing Hcrt neurons with eYFP fluorescence were sectioned using a VT1200s vibratome (Leica Microsystems). After ~20 min incubation at ~35 °C, the slices were stored at room temperature. Slices were used for maximally 5 hours after dissection. Experiments were performed at room temperature 21° to 24 °C.

*Recording and data analysis:* During experiments, slices were superfused with a physiological extracellular solution containing: 125 mM NaCl, 2.5 mM KCl, 25 mM NaHCO<sub>3</sub>, 1.25 mM NaH<sub>2</sub>PO<sub>4</sub>, 25 mM D-glucose, 2 mM CaCl<sub>2</sub>, and 1 mM MgCl<sub>2</sub> (pH 7.4 in 95% O<sub>2</sub> / 5% CO<sub>2</sub>, ~325 mOsm). Neurons were chosen based on eYFP expression and visualized with an Olympus BX51WI with Nomarski optics connected to a camera (Q-imaging). Thick wall borosilicate pipettes (1B150F-4, World Precision Instruments Inc.) were pulled using a P-97 puller (Sutter Instruments) and electrodes with a resistance of 3-6 megohms were used for recording. Intracellular solution used for whole-cell recording contained: 120 mM K-methyl-sulfonate, 10 mM NaCl, 10 mM EGTA, 1 mM CaCl<sub>2</sub>, 10 mM HEPES, 0.5 mM NaGTP, 5 mM MgATP, pH adjusted to 7.2 with KOH, osmolarity adjusted to 305 mOsm with sucrose; 0.2% biocytin was added for post-hoc staining. Neurons were recorded under current-clamp to examine excitability, or under voltage-clamp to examine PSCs. 1 sec step currents from -50 pA to 300 pA were used to evoke AP firing. For optogenetic stimuli, a 15 ms blue light



Li et al.

pulse (3.4 mW, calibrated with Thorlab light meter) was given at 1 Hz, 5 Hz, 10 Hz, 15 Hz and 20 Hz in a randomized manner for 10 sec to compare light-induced activity between the young and aged groups, and the interval between sweeps was 20 sec. Data were acquired with a Multiclamp 700B amplifier (Axon Instruments, USA), and sampled at 10 kHz. Stimulus generation and data acquisition were performed using pClamp 10. Data were analyzed using Stimfit 0.14.9 ([www.stimfit.org](http://www.stimfit.org)) and R 3.5.1 (the R project for statistical computing). RMP values were measured and averaged from temporal windows (at least 50 ms prior to the peak of a given AP for spontaneously firing neurons) with minimal membrane potential variance (54). The RMPs were determined without predicted/measured junction potential correction. All the amplitudes of APs and spikelets were calculated from RMPs. Depolarization events with a peak value above  $-20$  mV, and with a half width shorter than 6 ms were qualified for spikelet analyses. PSC recording from non-fluorescent neuron innervated by fluorescent Hcrt neuron expressing ChR2-eYFP was performed as illustrated in fig. S4A. For the PSC failure analysis, a success PSC was considered when a current deflection bigger than 10 pA occurred time-locked to the light pulse. The investigators were blind to the group information while conducting the data analyses.

LC neurons were recorded in slices prepared from WT young (2 to 3 months) and aged (18 to 21 months) mice, infused with biocytin, followed by antibody staining against tyrosine hydroxylase (TH). Only the neurons positive for both biocytin and TH were included for data analyses.

*I<sub>M</sub> recording:* For recording of the slowly deactivating M-current ( $I_M$ ) mediated by KCNQ2/3, perforated patch recordings were used to maintain the integrity of second messenger signaling cascades and minimize current rundown. The pore-forming antibiotic nystatin was dissolved in DMSO at 50 mg/ml. This stock solution was diluted in an internal pipette solution and vortexed and ultrasonicated for a final concentration of 100 to 200  $\mu$ g/ml. Pipette tips were pre-filled by brief immersion into antibiotic-free solution and then pipettes were back filled with nystatin. After the cell-attached configuration was attained, the access resistance was periodically monitored with hyperpolarizing voltage steps (10 mV, 20 ms) and capacitive transients were cancelled. After 10 to 20 minutes, recording was started once the access resistance stabilized. The

Li et al.

recording was terminated if a sudden change in access resistance occurred. Extracellular solution contained 4-AP (5 mM) to minimize contamination by other potassium currents, and AMPARs, glycine receptors and GABA<sub>A</sub> receptors were blocked by 6,7-dinitroquinoxaline-2,3-dione (DNQX, Tocris Cat. no. 0189, 10  $\mu$ M), strychnine (Sigma-Aldrich Cat. no. S0532, 1  $\mu$ M), (2R)-amino-5-phosphonopentanoate (APV, Tocris Cat. no. 0106, 100  $\mu$ M) and bicuculline (Sigma-Aldrich Cat. no. 285269, 10  $\mu$ M).  $I_M$  was recorded using a standard deactivation protocol (1000 ms hyperpolarizing steps to -30 mV from a holding potential of -20 mV every 10 sec, inter-sweep holding potential - 20 mV).  $I_M$  did not inactivate with this protocol, while contamination by other voltage-gated currents was minimized.  $I_M$  was measured as the inward relaxation current caused by deactivation of  $I_M$  during this voltage step (Fig. 4, G and H). After obtaining at least a stable 5 min baseline, XE991 (50  $\mu$ M) or flupirtine (50  $\mu$ M) was applied. The effect of XE991 or flupirtine was determined by comparing averaged  $I_M$  amplitudes over a 5 min period just before XE991 or flupirtine application with averaged  $I_M$  amplitudes during the 5 to 10 min period after XE991 or flupirtine application.

### ***Array tomography (AT)***

*Tissue preparation:* Array creation and immunohistochemistry were described in detail in a previous publication (55). In short, a small piece of tissue (~2 mm high by 1 mm wide by 1 mm deep), covering the LH containing eYFP-labeled Hcrt neurons, was microwave-fixed in 4% Paraformaldehyde (PFA). The fixed tissue was then dehydrated in graded steps of ethanol, and then embedded in LR White resin overnight at 50 °C. The embedded tissue was sectioned on an ultramicrotome at a thickness of 70 nm and placed as a ribbon array directly on gelatin or carbon coated glass coverslips. The ultrathin physical sectioning allows AT to achieve true isotropic voxels of ~100 nm. To assure that the brain tissue from animals were prepared and imaged in as similar conditions as possible, all samples were paired starting at the tissue preparation step. Thus, young and aged animals were prepared in tandem, placed on the same coverslip, stained together and imaged together. Furthermore, to minimize the impact of locational differences in the gathered tissue, multiple blocks were generated from LH of each mouse, and screened at 20 $\times$  using 4',6-diamidino-2-phenylindole (DAPI) fluorescence. Then similar tissue blocks were used for further analysis.

Li et al.

*Immunohistochemistry:* Immunohistochemistry was then carried out on the arrays using primary antibody against KCNQ2 (Alomone Cat. no. AGP-065). The primary antibodies were visualized via fluorescence-labeled secondary antibody: (Alexa 594, Invitrogen Cat. no. A11076), and mounted in SlowFade Gold antifade with DAPI (Invitrogen Cat. no. S36938).

*Microscopy:* Wide-field imaging of ribbons were accomplished on a Zeiss Axio Imager.Z1 Upright Fluorescence Microscope with motorized stage and AxioCam HR Digital Camera as previously described (56). A position list was generated for each ribbon array of ultrathin sections using custom software modules written for Axiovision. Single fields of view were imaged for each position in the position list using a Zeiss 63×/1.4 NA Plan-Apochromat objective.

*Image Registration and Processing:* Image stacks from AT were imported into Fiji (ImageJ) and aligned using both rigid and affine transformations with the Register Virtual Stacks plugin. The aligned image stacks were further registered across image sessions using Fiji and TrackEM. The aligned and registered image stacks were imported into Matlab and deconvolved using the native implementation of Richardson-Lucy deconvolution with empirical or theoretical PSFs with 10 iterations (56). Custom functions were written to automate and facilitate this workflow.

*eYFP Segmentation:* eYFP delimited protein amount was calculated using custom Matlab software. eYFP volumes were slightly dilated via morphological operations and used to segment protein data in image space. Segmentation custom functions were used to quantify the number and amount of proteins encapsulated by eYFP.

### ***Single-nucleus isolation, FACS sorting, RNA library preparation and sequencing***

3 weeks after virus injection, mice were deeply anesthetized using isoflurane and perfused with 1× PBS. The brains were rapidly dissected and transferred to a chilled metal Brain Slicer Matrix (Zivic Instruments, 500 μm coronal slice intervals), and the brain sections containing Hcrt neurons (AP: – 1.0 ~ – 2.0 mm) were sliced and transferred to 1× PBS on ice. Bilateral hypothalamic areas (LH) were identified and dissected under a stereoscope. LH tissue blocks were then transferred to a glass dounce homogenizer (Sigma-Aldrich) on ice

Li et al.

and homogenized in 1 ml Homogenization Buffer (57) containing Tris (pH 8.0, 10 mM), sucrose (250 mM), KCl (25 mM), MgCl<sub>2</sub> (5 mM), Triton-X100 (0.1%), RNasin Plus RNase Inhibitor (0.5%, Promega Cat. no. N2615), SUPERase·In™ RNase Inhibitor (0.5%, ThermoFisher Cat. no. AM2694), Protease Inhibitor Cocktail (1×, Promega Cat. no. G6521), DTT (0.1 mM) and DAPI (1:1000, Invitrogen Cat. no. D3571). LH tissue blocks from 3 mice per condition (young/aged male/female) were pooled each condition for isolation of nuclei. The nuclei were released by sequentially applying 10 to 12 strokes of the loose dounce pestle and 10 to 12 strokes of the tight dounce pestle on ice, followed by filtering the suspension through a 35 µm cell strainer (Falcon). The nuclei were then spun down by centrifugation (10 min, 900× g at 4 °C) and resuspended in the Wash Buffer (1× PBS containing 0.8% BSA, 0.5% RNasin Plus RNase Inhibitor and 0.5% SUPERase·In™ RNase Inhibitor). The single-nucleus suspension was further washed twice in Wash Buffer by centrifugation (10 min, 900× g at 4 °C). Fluorescence activated cell sorting (FACS) was performed using the 70 µm nozzle and optimal gates collecting the DsRed/DAPI double positive events and excluding debris and doublets. Sorted DsRed+ single nuclei were confirmed using a fluorescence microscope, and manually counted using a hemocytometer. snRNA-seq libraries were prepared using 10x Genomics Chromium Single Cell 3' Reagents v3 following manufacturer's instructions. Briefly, the concentration of single nuclei solution prepared from dissected LH tissue was determined using DAPI staining and Trypan Blue staining. The nuclei solution was loaded onto a Chromium Chip B to capture seven to ten thousand nuclei in droplets containing the reverse transcription reagents. After reverse transcription, the now barcoded cDNA was recovered and amplified for 12 polymerase chain reaction (PCR) cycles. After qualitative and quantitative control of the cDNA, the final libraries were constructed by fragmenting the cDNA, End Repair, and A-Tailing. After adapter ligation, the libraries were amplified for 11 PCR cycles. The libraries were sequenced using an Illumina MiSeq v3 150-cycle kit to check library quality and confirm the number of captured nuclei. Then all the barcoded samples were mixed and deep sequenced on an Illumina HiSeqX sequencing machine across 4 different lanes to avoid lane variability and potential lane failure.

### ***snRNA-seq data analysis***

Li et al.

Illumina fastq files were processed through the 10x Genomics cellranger pipeline according to the manufacturer's instructions. Briefly, reads were aligned to the mm10 mouse genome using a custom gtf annotation file which labeled all 'transcripts' as 'exons', thus allowing to count intronic as well as exonic reads. The four libraries were then combined using cellranger *aggr* command to match sequencing depth per cell across libraries. All further processing of the genes X cells count matrix was performed in Seurat V3 (58) using scTransform normalization (59). First, the population of Hcrt+ neurons were identified out of all sequenced cells by coarse Louvian clustering of the entire sequencing dataset. Only one cluster showed Hcrt expression. This cluster was then separately subclustered, and all doublet clusters were removed. No large batch effects were observed at this level. A core set of three clusters, all of which expressed Hcrt at high levels, served as the basis for the analysis of age related effects.

### ***CRISPR/SaCas9-mediated Kcnq2/3 gene disruption in Hcrt neurons***

The target sites of *Kcnq2/3* genes for Staphylococcus aureus CRISPR/Cas9 (CRISPR/SaCas9) were designed by CHOPCHOP (<http://chopchop.cbu.uib.no>) (60). The target sequences were as follows: sgKcnq2: 5'-CGCGTGTGGAGTCGGGCGCGC-3', sgKcnq3: 5'-GCGGCCACCGCCCTCCAGCAG-3'. Oligonucleotides encoding guide sequences were purchased from Sigma-Aldrich and cloned individually into BsaI fragment of pX601 (Addgene plasmid 61591). U6-sgKcnq2 and U6-sgKcnq3 fragments were PCR-amplified, respectively using pX601-sgKcnq as a template. Amplified fragments were cloned tandemly into MluI-digested pAAV CAG FLEX mCherry by Gibson assembly method. The primers used were as follows; Gibson1-F: 5'-TAGGGGTTCTGCGGCCGCAGAGGGCCTATTTCCCATG-3', Gibson1-R: 5'-ATAGGCCCTCTCTAGAAAAAATCTCGCCAAC-3', Gibson2-F: 5'-TTTTTCTAGAGAGGGCCTATTTCCCATG-3', Gibson2-R: 5'-TCATTATTGACGTCAATGGAAAAAATCTCGCCAACAAGTTG-3'. AAV constructs carrying non-targeting guide sequences (5'-GCGAGGTATTCGGCTCCGCGT-3') were used as control. For the Cre-dependent SaCas9 construct, SaCas9 fused with 3× HA tag was PCR amplified using pX601 as a template. Amplified fragment was cloned into AscI/NheI-double digested pAAV-U6-SaCas9gRNA(SapI)-CMV-

Li et al.

SaCas9-DIO-pA (Addgene plasmid 113691). Next, the plasmid was digested by MluI and applied to self-ligation to remove U6 promoter and single-guide RNA (sgRNA) scaffold sequences. pAAV CMV-DIO-SaCas9-3HA (SaCas9), pAAV U6 sgKcnq2-U6 sgKcnq3 CAG FLEX mCherry (sgKcnq2/3) and pAAV U6 sgControl-U6 sgControl CAG FLEX mCherry (sgControl) were packaged into AAV-DJ by the Wu Tsai Neurosciences Institute Gene Vector and Virus Core at Stanford University.

20 young (6 to 8 weeks old) Hcrt::Cre mice were separated into two groups in a random manner (n = 10/group). Under anesthetics and analgesic, according to the Hcrt neuron field coordinates as described above, one group received bilateral stereotaxic injection of a 0.6  $\mu$ l (each side, 0.3 mm apart in depth) mixture of SaCas9 ( $2.4 \times 10^{13}$  gc/ml) and sgControl ( $6.24 \times 10^{12}$  gc/ml) and implanted with EEG/EMG electrodes to serve as the control group. The other group received bilateral stereotaxic injection of a 0.6  $\mu$ l mixture of SaCas9 and sgKcnq2/3 ( $2.97 \times 10^{12}$  gc/ml) and implanted with EEG/EMG electrodes to monitor the effect of Hcrt neuron-selective *Kcnq2/3* gene disruption on sleep architecture. After surgery, mice were connected to EEG/EMG recording cables and singly-housed with food and water ad libitum to recover, and for EEG/EMG signal recording. EEG/EMG signals were recorded continuously on day 6 and day 7 weekly up to 8 weeks (EEG/EMG recording lasted until 12 weeks in half of each group) after surgery. Following recording in week 8/12 after virus injection, slices were prepared from each group for in vitro electrophysiology experiment to determine RMP and firing property of the Hcrt neurons labeled by mCherry flag. Patch clamp recorded cells were infused with biocytin for subsequent immunostaining. The data were used for statistical analysis only if the recorded neurons were stained to co-express biocytin and HA tag.

### ***Histology***

For in vivo experiments, upon accomplishment of recordings, mice were perfused under anesthesia described above with ice-cold 1 $\times$  PBS and followed by 4% PFA for immunostaining against Hcrt1/OXA for Hcrt neurons, and TH for LC NA neurons. Brains were rapidly extracted, postfixed with 4% PFA at 4  $^{\circ}$ C overnight, and equilibrated in 30% sucrose in 1 $\times$  PBS containing 0.1% NaN<sub>3</sub>. Then, brains were sectioned at - 22  $^{\circ}$ C with a cryostat (Leica Microsystems) at a thickness of 35  $\mu$ m. Slices were collected from anterior to posterior

Li et al.

consecutively to 24-well plates containing PBS with 0.1% NaN<sub>3</sub>, covered with aluminum foil, and stored at 4 °C until immunostaining and imaging. Primary antibody against OXA/Hcrt1 (SC-8070, Lot no. A2915, Goat polyclonal IgG) was purchased from Santa Cruz Biotechnology. Primary antibody against TH (Chicken polyclonal anti-peptide, Cat. TYH, Lot no. TYH1897983) was purchased from Avēs. Primary antibody against HA tag (Rabbit Anti-HA tag pAb, Item no. 561, Lot no. 067) was purchased from MBL International Corporation. Secondary antibodies: Alexa Fluor 488 Goat anti-chicken IgG (H+L, Ref. no. A11039, Lot no. 1094413), Alexa Fluor 488 donkey anti-goat IgG (H+L, Ref. no. A11055, Lot no. 1869589), Alexa Fluor 488 donkey anti-rabbit IgG (H+L, Ref. no. A21206, Lot no. 1910751), Alexa Fluor 647 donkey anti-goat IgG (H+L, Ref. no. A21447, Lot no. 2175459), were purchased from Invitrogen (Manufacturer: Life Technologies). Alexa Fluor 594 streptavidin conjugate (Ref. no. S11227, Lot no. 1991448) and Alexa Fluor 647 streptavidin conjugate (Ref. no. S32357, Lot no. 1738557) to label neurons infused with biocytin were purchased from Invitrogen. For the WT mice used for comparison of sleep patterns, sections around LH and LC were washed in 1× PBS for 5 minutes, 3 times and incubated in a blocking solution of PBS with 0.3% Triton X-100 (PBST) and 4% bovine serum albumin (BSA) for 1 hour. Following that, OXA/Hcrt1 primary antibody was added to the blocking solution (1:800) overnight. On the second day, sections were washed in 1× PBS for 3 times (5 min/time), and incubated in blocking buffer for 2 hours. After blocking, secondary antibody was added to the blocking buffer for 2 hours (dilution 1:800). After 3 times of 5-min 1× PBS washing, brain sections were mounted onto gelatin-coated slides, covered with Fluoroshield containing DAPI mounting media (Sigma-Aldrich, F6057) and cover glass for imaging with wide field microscope (Zeiss AxioImager, Germany) for entire section or LSM710 Confocal Microscope for enlarged visualization (Zeiss, Germany). For brain slices infected with Cre-dependent viruses, slices around the injection site were collected and stained with appropriate antibodies as described above. Alexa Fluor 594 streptavidin conjugate or Alexa Fluor 647 streptavidin conjugate for staining of biocytin was added together with the secondary fluorescent antibody for Hcrt1, TH or HA tag on the second staining day for in vitro experiment slices.

### ***Object recognition test***

Li et al.

Aged mice (~20 months, singly-housed with a reversed 12-h/12-h light/dark cycle, 9 pm light on, Zeitgeber time 0/ZT 0) were used to evaluate flupirtine's effect on memory ability in the object recognition task. The object recognition task was performed according to a protocol described by Leger et al. (61). The protocol consisted of habituation, familiarization and test sessions (fig. S8). During each habituation session, an individual mouse was released to the arena (34 cm × 17 cm, non-transparent open field filled with Sani-Chip pine bedding floor) for habituation of 5 min. Each mouse underwent two habituation sessions conducted during ZT16-18 and ZT22-24 for 3 consecutive days. During the familiarization session (Day 4: ZT22-24), each mouse was allowed to explore two identical objects for a total of 5 min. Each object was placed at the same distance from the walls and corners of the field without spatial or odor cues (bedding was changed; arena and objects were cleaned with 70% ethanol before each exposure). After the familiarization session, mice were intraperitoneally injected with either vehicle or flupirtine (20 mg/kg) at the beginning of the following light phase. During the test session (Day 5: ZT22-24), mice were placed in the same arena with one of the familiar objects from the familiarization session replaced by a similar size novel object. The position of the novel object (left or right) was randomized for each mouse and each group tested. Time spent facing away from object within the 7 cm radius or climbing on object was not qualified as exploration. Mice were randomly assigned to control/flupirtine group through a counterbalanced crossover design. Two rounds of object recognition task (with two sets of familiar and novel objects) were separated by one week for a complete drug wash-out. Animal-based averaged value of two rounds of familiarization was presented. Mouse with over 65% preference for either object during the familiarization session was not qualified to proceed to the next session.

### ***Statistics***

One/two hour-binned sleep comparisons were analyzed by two-way repeated measure (RM) analysis of variance (ANOVA) (linear mixed-effects model for counterbalanced crossover design) followed by Šidák's multiple comparisons. Holm-Šidák was used for comparison based on 24 h/light/dark phase. Unpaired *t*-test with Welch's correction was used for GCaMP6f data and in vivo optogenetic data analyses. For slice



Li et al.

electrophysiology, Mann-Whitney  $U$  test, RM one-way ANOVA, two-way ANOVA were used to analyze appropriate datasets. Paired test was used for data analyses of experiments with paired design. Spearman correlation with a linear fit was performed for 2-dimensional data correlation analysis. For snRNA-seq data, differentially expressed genes across ages were determined using the Wilcoxon rank-sum test, considering only those genes with a Bonferroni adjusted  $P < 0.05$ . Differences with  $P < 0.05$  were considered significant for all experiments. In figures, \*, \*\*, \*\*\*, \*\*\*\*, and † indicate  $P < 0.05$ ,  $P < 0.01$ ,  $P < 0.005$ ,  $P < 0.001$ , and  $P < 0.0005$ , respectively, and ns indicates not significant. Data with error bars were reported as mean  $\pm$  SEM. Details on statistical analyses have been described in the supplementary text.

## figs. S1 to S14

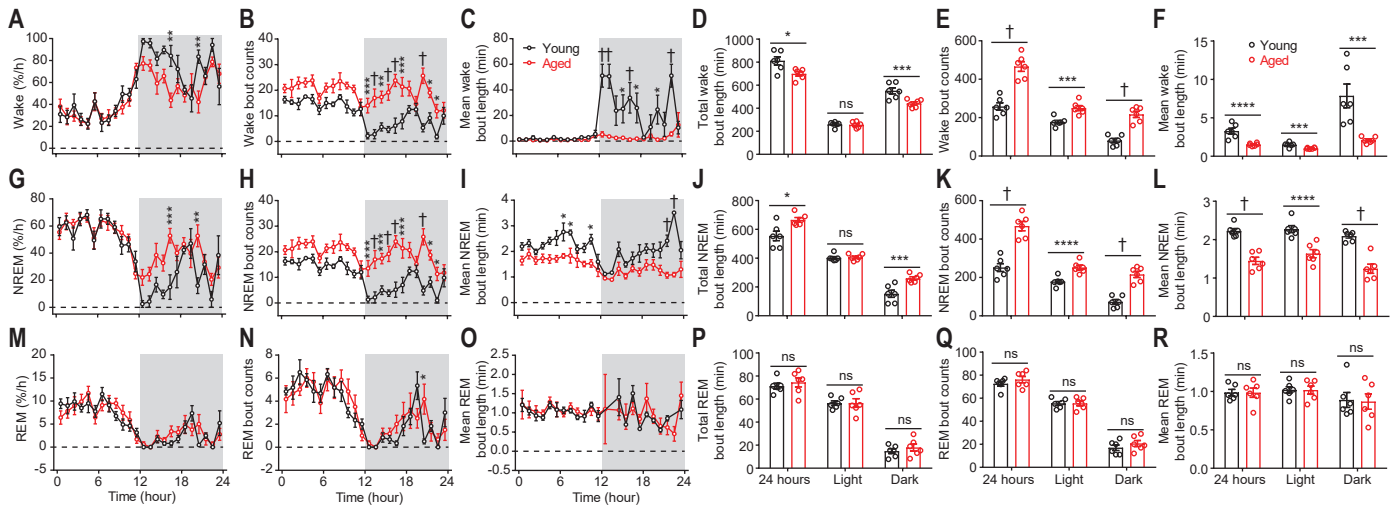

**fig. S1. Comparison of sleep/wake patterns between young (3 months) and aged (20 months) mice.** (A to F) Comparison of (A) hourly-based percentage, (B) hourly-based bout counts, (C) hourly-based mean bout length, (D) total bout length, (E) total bout counts, and (F) mean bout length of wakefulness between young and aged mice. (G to L) Comparison of (G) hourly-based percentage, (H) hourly-based bout counts, (I) hourly-based mean bout length, (J) total bout length, (K) total bout counts, and (L) mean bout length of NREM sleep between young and aged mice. (M to R) Comparison of (M) hourly-based percentage, (N) hourly-based bout counts, (O) hourly-based mean bout length, (P) total bout length, (Q) total bout counts, and (R) mean bout length of REM sleep between young and aged mice. Data indicate mean  $\pm$  SEM (A to C, G to I, M to O: two-way RM ANOVA followed by Šidák's multiple comparisons, dark phase indicated by gray shielding; D to F, J to L, P to R: Holm-Šidák; \* $P < 0.05$ , \*\* $P < 0.01$ , \*\*\*\* $P < 0.0005$ , † $P < 0.0005$ ;  $n = 6$  mice each group; statistical details are available in the supplementary text).

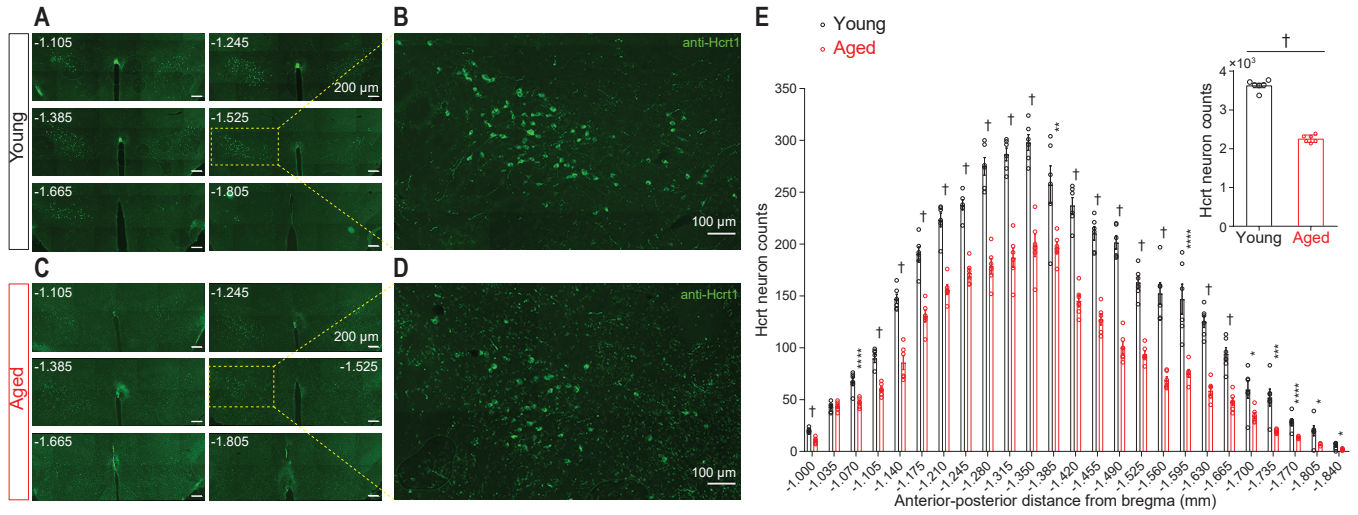

**fig. S2. Significant Hcrt neuron loss in aged mice.** (A and B) Antibody staining against Hcrt1 in brain slices spanning anterior-posterior (from bregma)  $-1.000$  mm to  $-1.840$  mm from a young mouse. (A) Representative young slices spaced by  $0.140$  mm, and (B) magnified display of the boxed region in panel A. (C and D) Antibody staining against Hcrt1 in brain slices spanning anterior-posterior (from bregma)  $-1.000$  mm to  $-1.840$  mm from an aged mouse. (C) Representative aged slices spaced by  $0.140$  mm, and (D) magnified display of the boxed region in panel C. (E) Anterior-posterior location-matched comparison of Hcrt neuron counts, and (inset) total Hcrt neuron counts between the young and aged groups. Data indicate mean  $\pm$  SEM ( $n = 6$  mice each group; two-way ANOVA followed by Šidák's multiple comparisons; inset: unpaired  $t$ -test; \* $P < 0.05$ , \*\* $P < 0.01$ , \*\*\* $P < 0.005$ , \*\*\*\* $P < 0.001$ , † $P < 0.0005$ ; statistical details are available in the supplementary text).

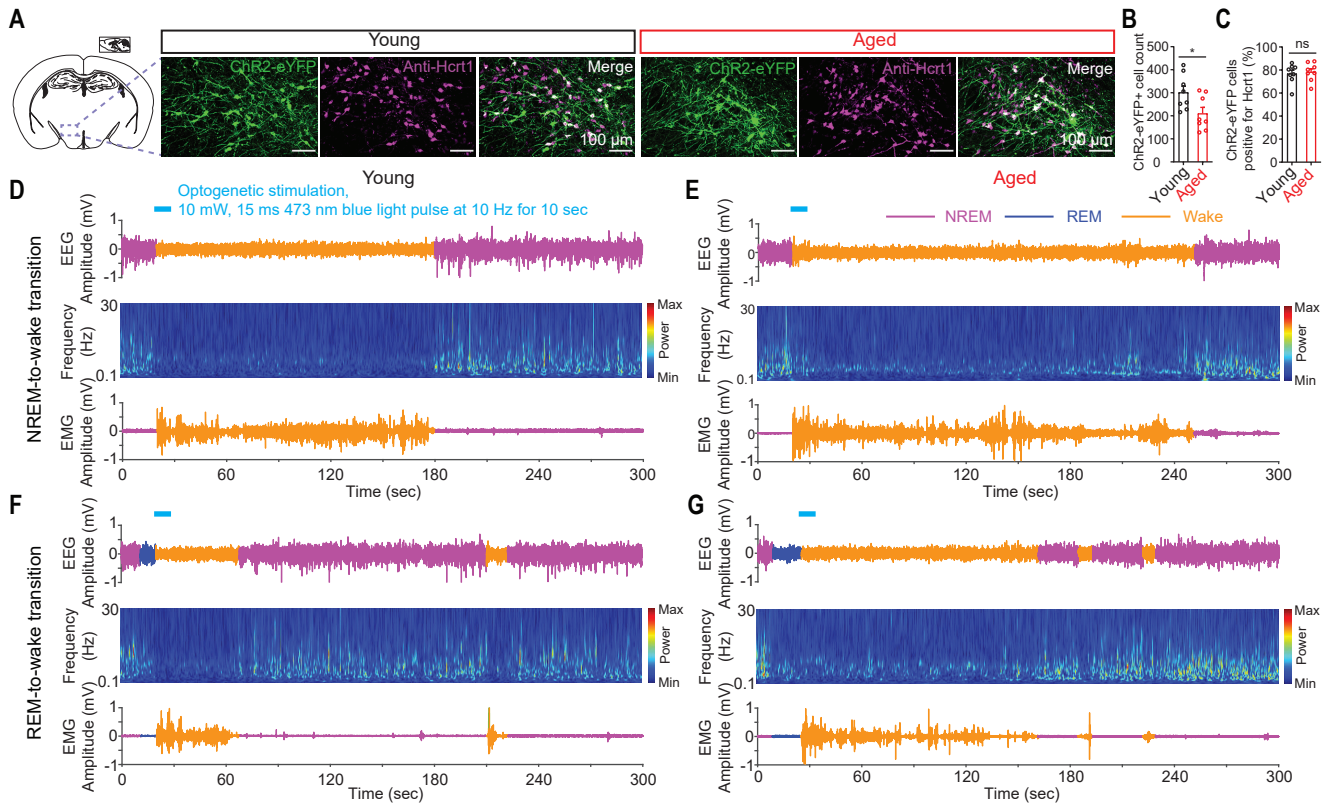

**fig. S3. Representative EEG-EMG traces for sleep-to-wake transitions upon optogenetic stimulation of Hcrt neurons expressing ChR2-eYFP in young and aged Hcrt::Cre mice.** (A) Representative LH slices containing neurons expressing ChR2-eYFP beneath the optical stimulation fiber tip stained with antibody against Hcrt1 from the young and aged groups. (B and C) (B) Less ChR2-eYFP-expressing neurons in the aged group and (C) comparable fractions of ChR2-eYFP expressing neurons positive for Hcrt1 staining in the young and aged groups ( $n = 8$  mice each group, Mann-Whitney  $U$  test; statistical details are available in the supplementary text). (D and E) Representative traces for sleep-to-wake transitions upon optogenetic stimulation of Hcrt neurons during NREM sleep in (D) a young and (E) an aged Hcrt::Cre mouse respectively. (F and G) Representative traces for sleep-to-wake transitions upon optogenetic stimulation of Hcrt neurons during REM sleep in (F) a young and (G) an aged Hcrt::Cre mouse respectively.

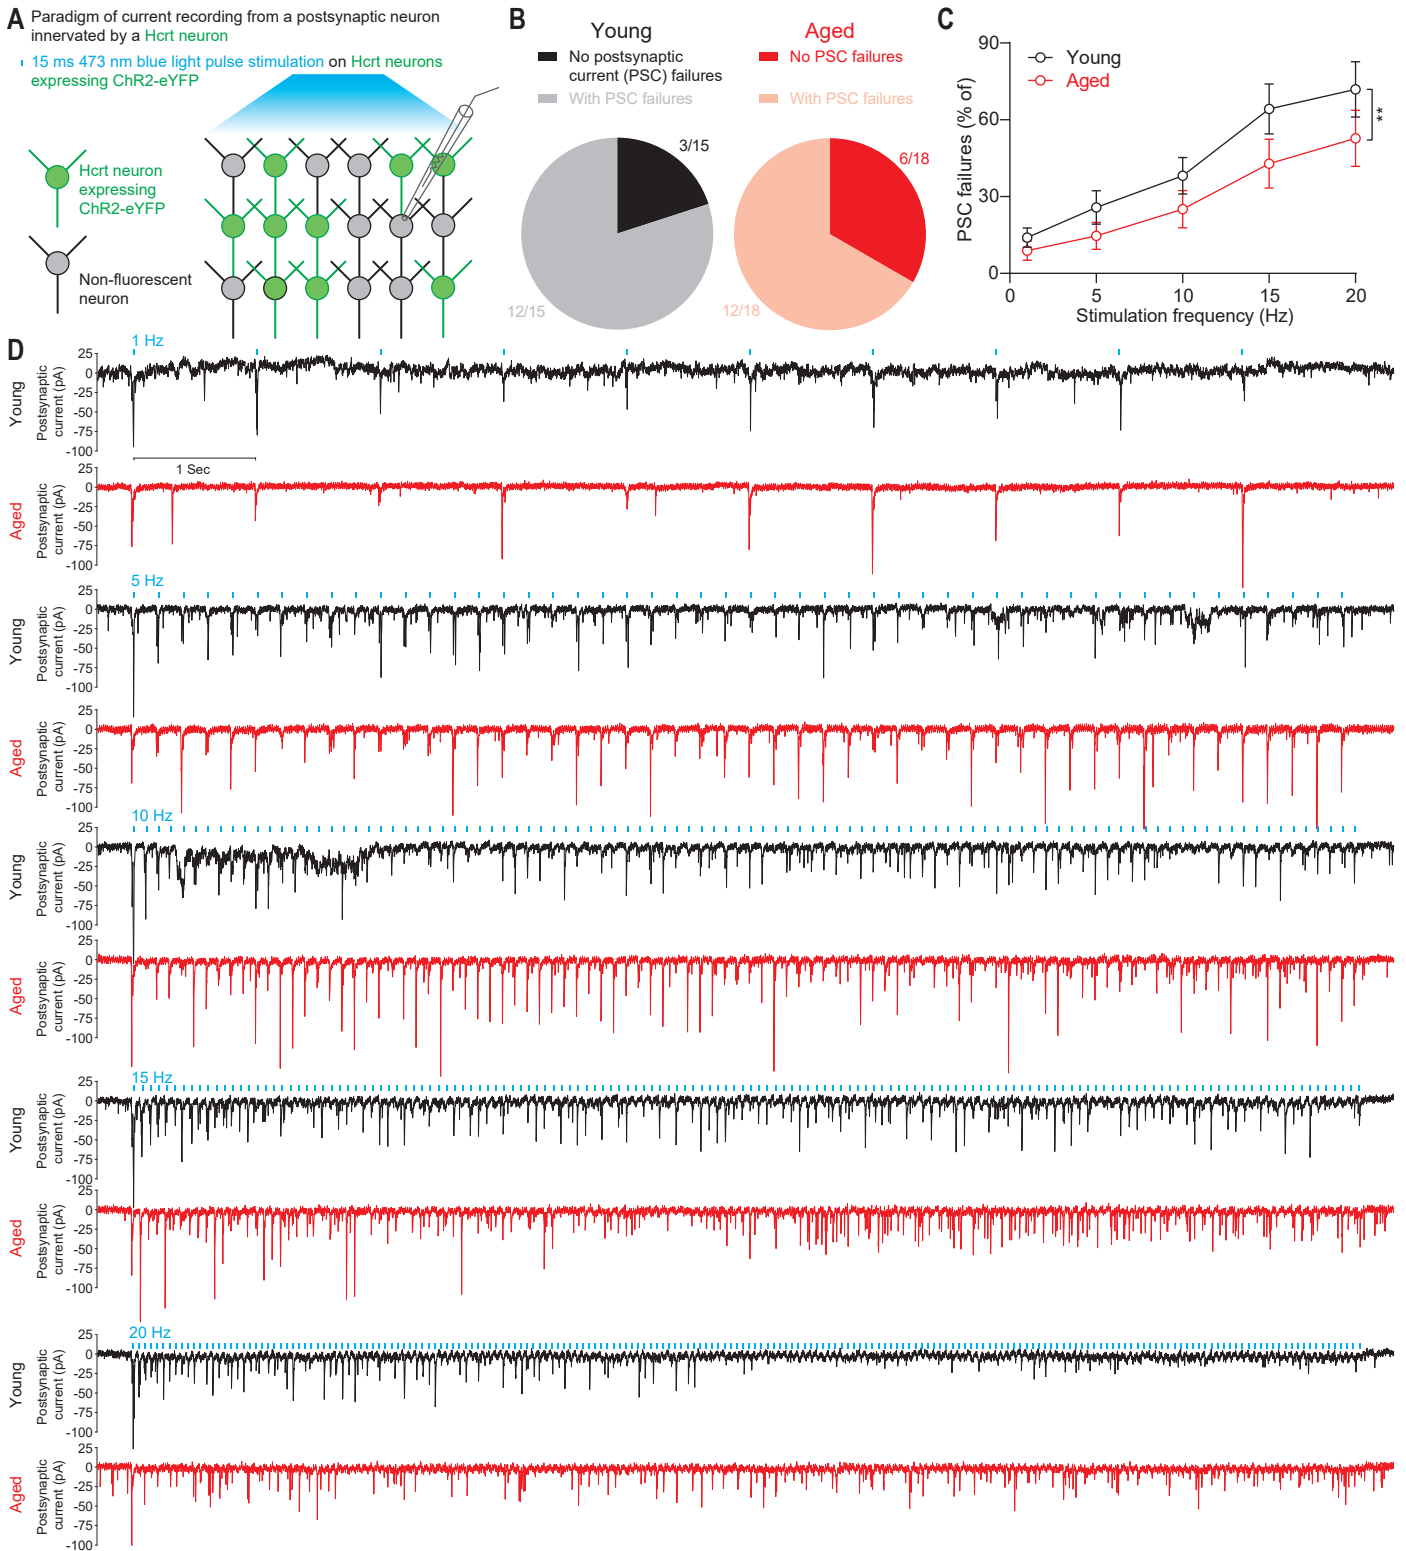

**fig. S4. Voltage-clamp recording from non-fluorescent neurons during optogenetic stimulation of Hcrt neurons in the same slice.** (A) Schematic of patch clamp recording from a non-fluorescent neuron innervated by a fluorescent ChR2-eYFP expressing Hcrt neuron in a brain slice. (B and C) (B) Fractions of young and aged Hcrt postsynaptic neurons with/without PSC failures following optogenetic stimulation of Hcrt neurons at (C) different frequencies (young:  $n = 15$  neurons from three mice versus aged:  $n = 18$  neurons from three mice). (D) Representative synaptic current traces recorded from young and aged neurons while optogenetically stimulating ChR2-eYFP-expressing Hcrt neurons in slices. Data indicate mean  $\pm$  SEM [(C) two-way ANOVA followed by post-hoc Šidák's multiple comparisons;  $**P < 0.01$ ; statistical details are available in the supplementary text].

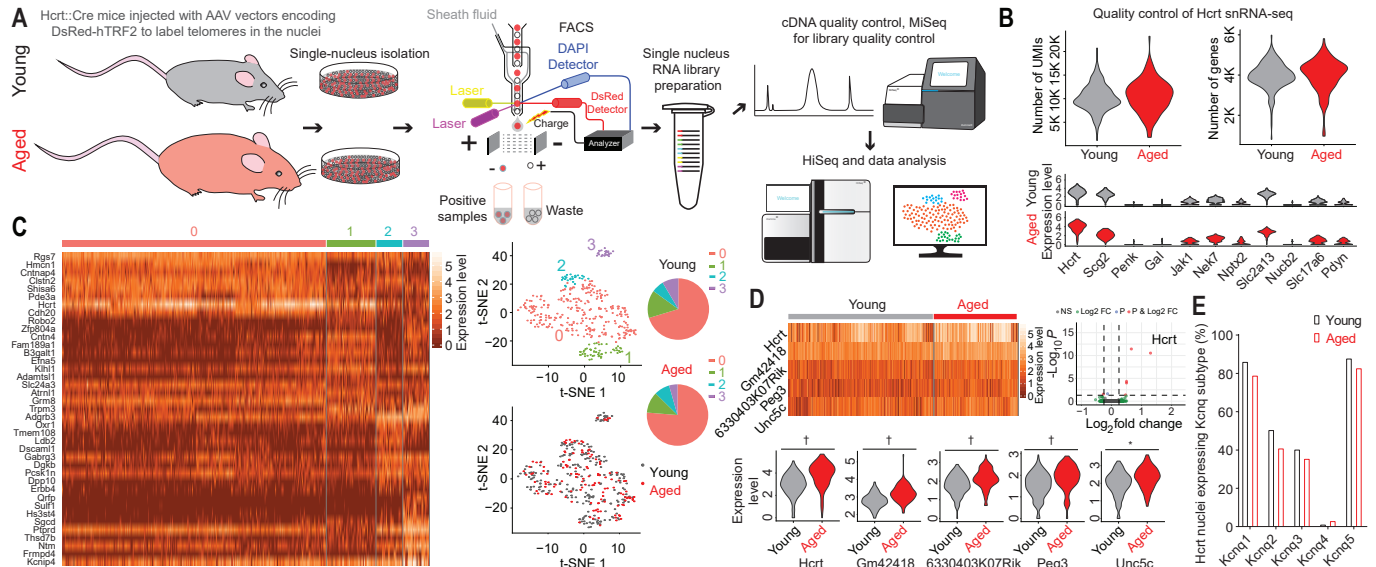

**fig. S5. Single-nucleus RNA-sequencing of Hcrt neurons from young and aged male Hcrt::Cre mice.** (A) Flowchart of single-nucleus RNA library preparation, quality control, sequencing and data analysis. (B) Sequencing data quality control. (top left) Comparable sequencing depth and (top right) numbers of genes between young and aged Hcrt nuclei. (bottom) Similar expression profiles of representative genes in young and aged Hcrt nuclei. (C) (left) Gene expression level for t-SNE plot showing (middle top) 4 distinct Hcrt neuron clusters, and (middle bottom) young and aged Hcrt nuclei distribute similarly among these clusters. (right) Comparable fractions of each cluster in young and aged Hcrt nuclei. (D) Genes expressed with significant differences between young and aged Hcrt nuclei. (top left) Heatmap of individual Hcrt nucleus with gene expression level; (top right) volcano plot of regulation significance  $-\text{Log}_{10}P$  against expression  $\text{Log}_2$  fold change (FC) with expression level normalized to young Hcrt dataset; (bottom) significantly upregulated genes in aged Hcrt nuclei (Wilcoxon rank-sum test, considering only those genes with a Bonferroni adjusted  $P < 0.05$ ;  $*P < 0.05$ ,  $\dagger P < 0.0005$ ; statistical details are available in the supplementary text). (E) Percentage of Hcrt nuclei expressing *Kcnq* subtypes in young and aged male mice. Note the lower percentage of aged Hcrt nuclei actively expressing the dominant subtypes *Kcnq1/2/3/5*.



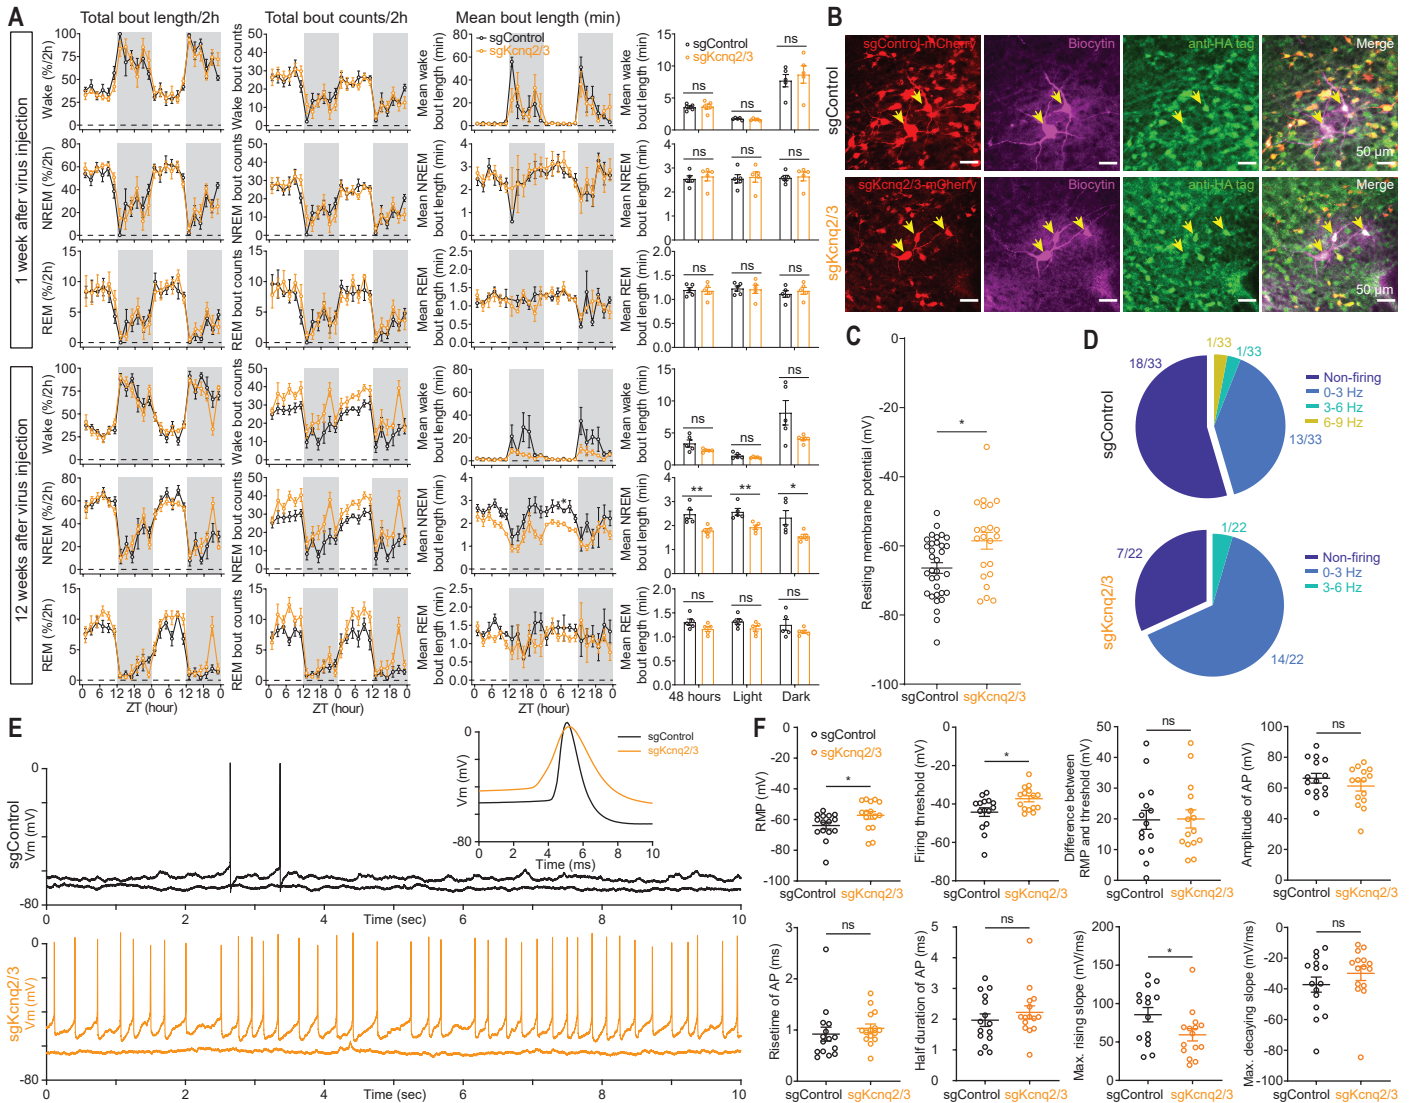

**fig. S7. CRISPR/Cas9-mediated disruption of *Kcnq2/3* genes in Hcrt neurons leads to NREM sleep fragmentation in young Hcrt::Cre mice.** (A) 2 hour (left) binned percentage, (middle left) bout counts, (middle right) mean bout length, and (right) mean bout length based on circadian phase for wake, NREM, and REM sleep at 1 week (top), and 12 weeks (bottom) after injection of a virus mixture containing CRISPR reagents (n = 5 mice/group, dark phase indicated by gray shielding). (B) Images of representative slices from sgControl and sgKcnq2/3 groups infected with a virus mixture expressing fluorescent flag mCherry and HA tag following EEG-EMG recording at 12 weeks after virus injection. Patch clamp recorded cells were labeled with biocytin, and post hoc antibody staining against HA tag confirmed the cells expressing SaCas9 for data analyses. (C) Comparison of RMPs between sgControl and sgKcnq2/3 group (sgControl: n = 33 neurons from 6 mice versus sgKCNQ2/3: n = 22 neurons from 6 mice) pooled from 8 and 12 weeks after virus injection. (D) Fractions of neurons with different firing frequencies in the sgControl and sgKcnq2/3 group. (E) Representative traces with and without spontaneous firing activity. (Inset) Averaged traces for the young and aged spontaneous APs. (F) Comparisons of basic electrophysiological properties of neurons from the sgControl and sgKcnq2/3 group (sgControl: n = 15 neurons from 6 mice versus sgKCNQ2/3: n = 15 neurons from 6 mice). Data indicate mean  $\pm$  SEM [(A) left to middle right, two-way RM ANOVA followed by Šidák's multiple comparisons; (A) right, Holm-Šidák; (C) and (F) Mann-Whitney *U* test; \* $P < 0.05$ ; statistical details are available in the supplementary text).



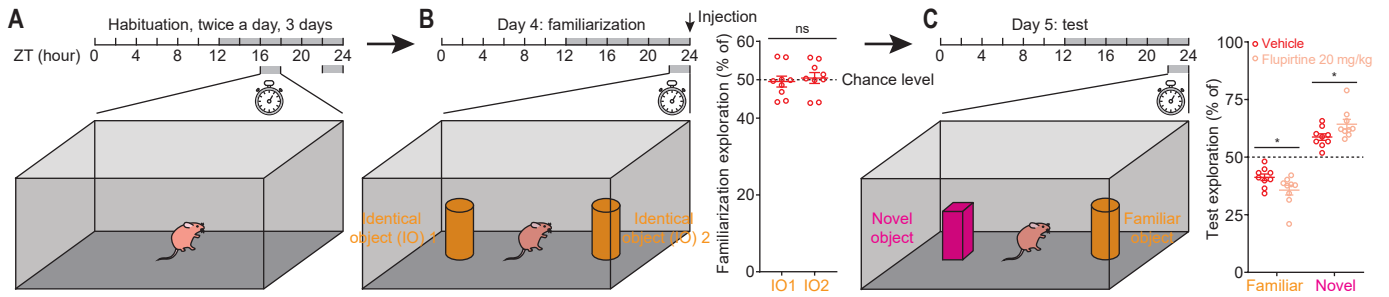

**fig. S8. Performance of aged mice improved by flupirtine in an object recognition task. (A)** Habituation session. **(B)** Familiarization session. **(C)** Test session. (A) to (C)  $n = 9$  mice each group, unpaired  $t$ -test with Welch's correction,  $*P < 0.05$ ; statistical details are available in the supplementary text.

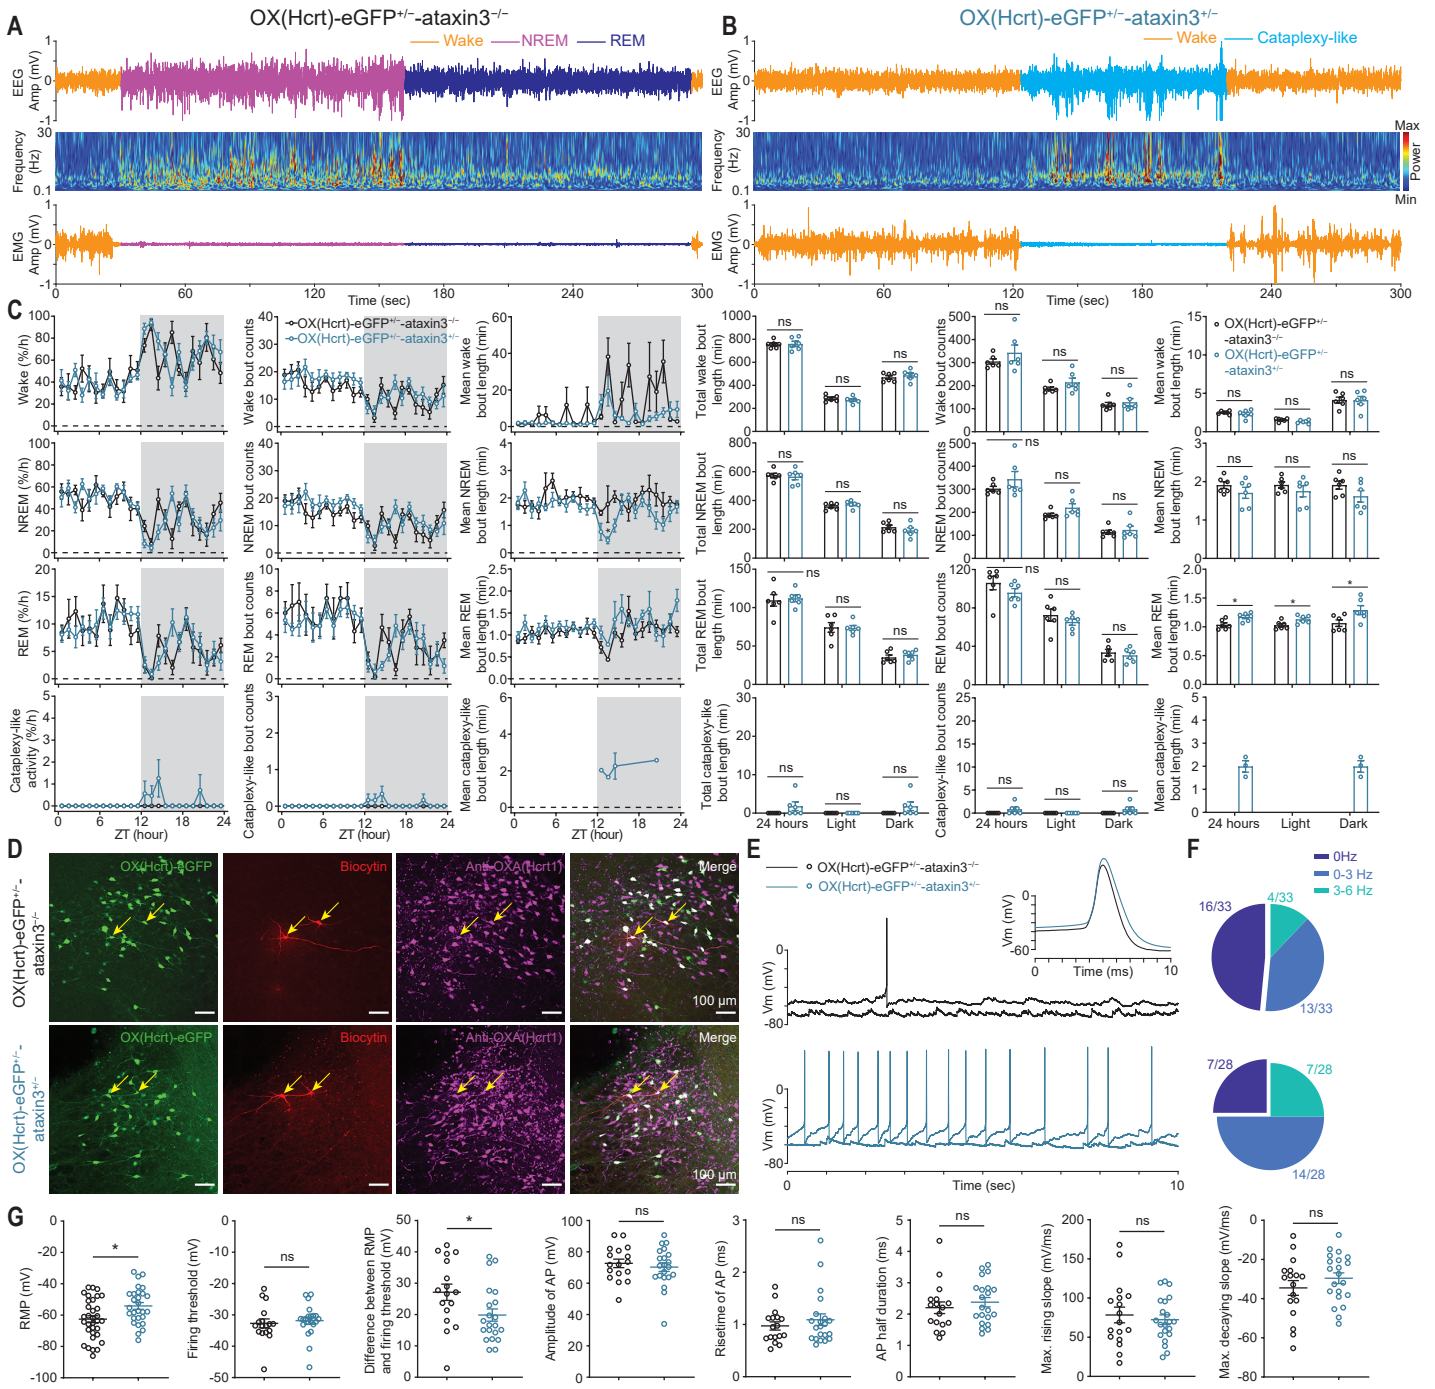

**fig. S9. Cataplexy-like EEG-EMG pattern and NREM sleep fragmentation emerging during rapid OX(Hcrt) neuron loss in the OX(Hcrt)-ataxin3 narcolepsy mouse model at 5-week-old.** (A) Representative EEG, EEG power spectrum, and EMG for a normal behavioral transition. (B) Representative EEG, EEG power spectrum, and EMG for a behavioral transition from wake to cataplexy-like EEG-EMG pattern. (C) Comparison of sleep architectures between OX(Hcrt)-eGFP<sup>+/-</sup>-ataxin3<sup>-/-</sup> (control) and OX(Hcrt)-eGFP<sup>+/-</sup>-ataxin3<sup>+/-</sup> (ataxin3<sup>+</sup>) mice at 5-week-old. (D) Representative slices from control and ataxin3<sup>+</sup> mice at 5-week-old. Patch clamp recorded cells labeled with biocytin and post hoc antibody staining against OXA(Hcrt1). (E to G) (E) Representative spontaneous activities (inset, averaged traces of the spontaneous APs) recorded from control and ataxin3<sup>+</sup> mice, (F) fractions of neurons with different firing frequencies, and comparison of [first panel in (G)] RMPs (n = 33 neurons from three control mice versus n = 28 neurons from three ataxin3<sup>+</sup> mice) and [other panels in (G)] other AP basic electrophysiological properties (n = 17 neurons from three control mice versus n = 21 neurons from three ataxin3<sup>+</sup> mice) for spontaneously firing neurons. Statistical details are available in the supplementary text.



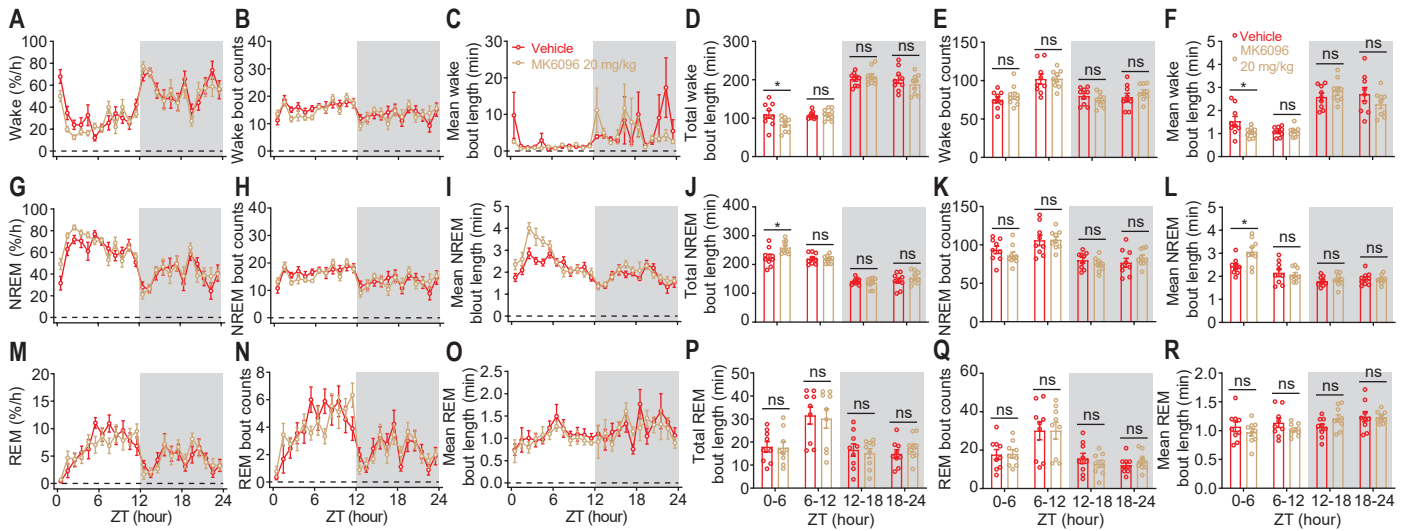

**fig. S11. Effect of a dual Hcrt/OX receptor antagonist MK6096 (filorexant, 20 mg/kg) on sleep architecture in aged mice.** (A to F) Comparison of (A) hourly-based percentage, (B) hourly-based bout counts, (C) hourly-based mean bout length, (D) total bout length, (E) total bout counts, and (F) mean bout length of wakefulness between vehicle- and MK6096-treated aged mice. (G to L) Comparison of (G) hourly-based percentage, (H) hourly-based bout counts, (I) hourly-based mean bout length, (J) total bout length, (K) total bout counts, and (L) mean bout length of NREM sleep between vehicle- and MK6096-treated aged mice. (M to R) Comparison of (M) hourly-based percentage, (N) hourly-based bout counts, (O) hourly-based mean bout length, (P) total bout length, (Q) total bout counts, and (R) mean bout length of REM sleep between vehicle- and MK6096-treated aged mice. Data indicate mean  $\pm$  SEM [(A) to (C), (G) to (I), (M) to (O), two-way RM ANOVA (linear mixed-effects model) followed by Šidák's multiple comparisons, dark phase indicated by gray shielding; (D) to (F), (J) to (L), (P) to (R), Holm-Šidák; \* $P < 0.05$ ,  $n = 9$  mice each group; statistical details are available in the supplementary text].

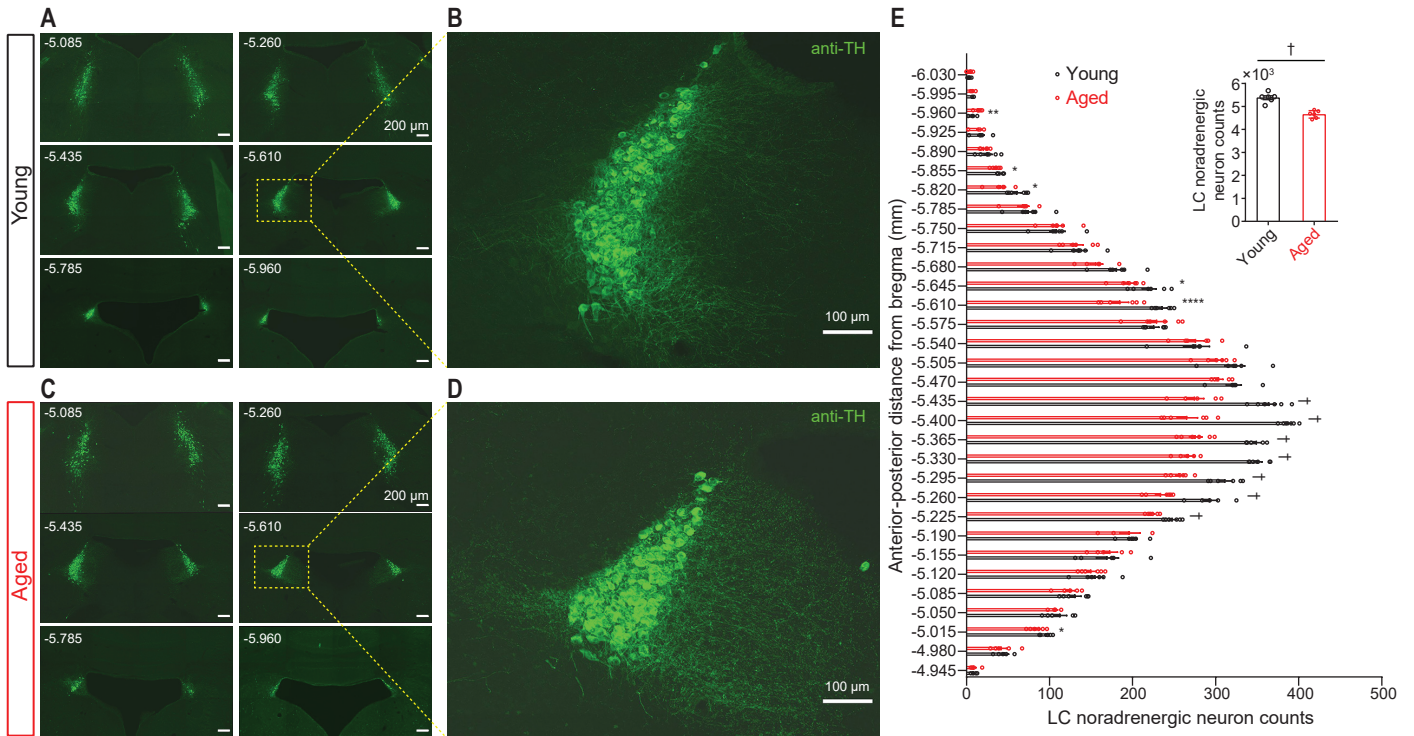

**fig. S12. Locus coeruleus (LC) noradrenergic (NA) neuron loss in aged mice.** (A and B) Antibody staining against tyrosine hydroxylase (TH) in brain slices spanning anterior-posterior (from bregma) – 4.945 to – 6.030 mm from a young mouse. (A) Representative young slices spaced by 0.175 mm, and (B) magnified display of the boxed region in panel A. (C and D) Antibody staining against TH in brain slices spanning anterior-posterior (from bregma) – 4.945 to – 6.030 mm from an aged mouse. (C) Representative aged slices spaced by 0.175 mm, and (D) magnified display of the boxed region in panel C. (E) Anterior-posterior location-matched comparison of noradrenergic neuron counts, and (inset) total noradrenergic neuron counts between the young and aged group. Data indicate mean  $\pm$  SEM ( $n = 6$  mice each group; two-way ANOVA followed by Šidák's multiple comparisons; inset: unpaired  $t$ -test;  $*P < 0.05$ ,  $**P < 0.01$ ,  $****P < 0.001$ ,  $\dagger P < 0.0005$ ; statistical details are available in the supplementary text).

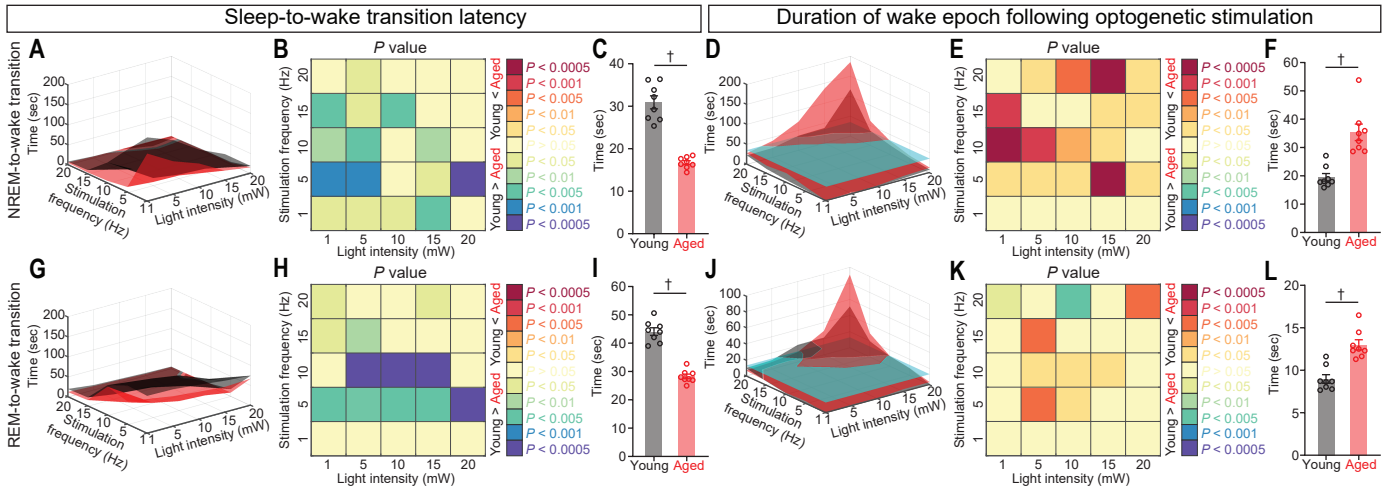

**fig. S13. Longer wake bouts with shorter latencies upon optogenetic stimulation of LC NA neurons expressing ChR2-eYFP in aged TH::Cre mice.** (A) Surface plot of NREM-to-wake transition latency based on the mean value of each stimulation condition. (B and C) Comparison of NREM-to-wake transition latency based on (B) each stimulation condition and (C) the mean value for each animal (C). (D) Surface plot of wake duration based on the mean value of each stimulation condition. The cyan cutaway surface indicates the mean value for the aged group. (E and F) Comparison of wake duration based on (E) each stimulation condition and (F) the mean value for each animal. (G) Surface plot of REM-to-wake transition latency based on the mean value of each stimulation condition. (H and I) Comparison of REM-to-wake transition latency based on (H) each stimulation condition and (I) the mean value for each animal. (J) Surface plot of wake duration based on the mean value of each stimulation condition. The cyan cutaway surface indicates the mean value for the aged group. (K and L) Comparison of wake duration based on (K) each stimulation condition and (L) the mean value for each animal. (B), (C), (E), (F), (H), (I), (K), (L): Mann-Whitney  $U$  test; † $P < 0.0005$ . Statistical details are available in the supplementary text.

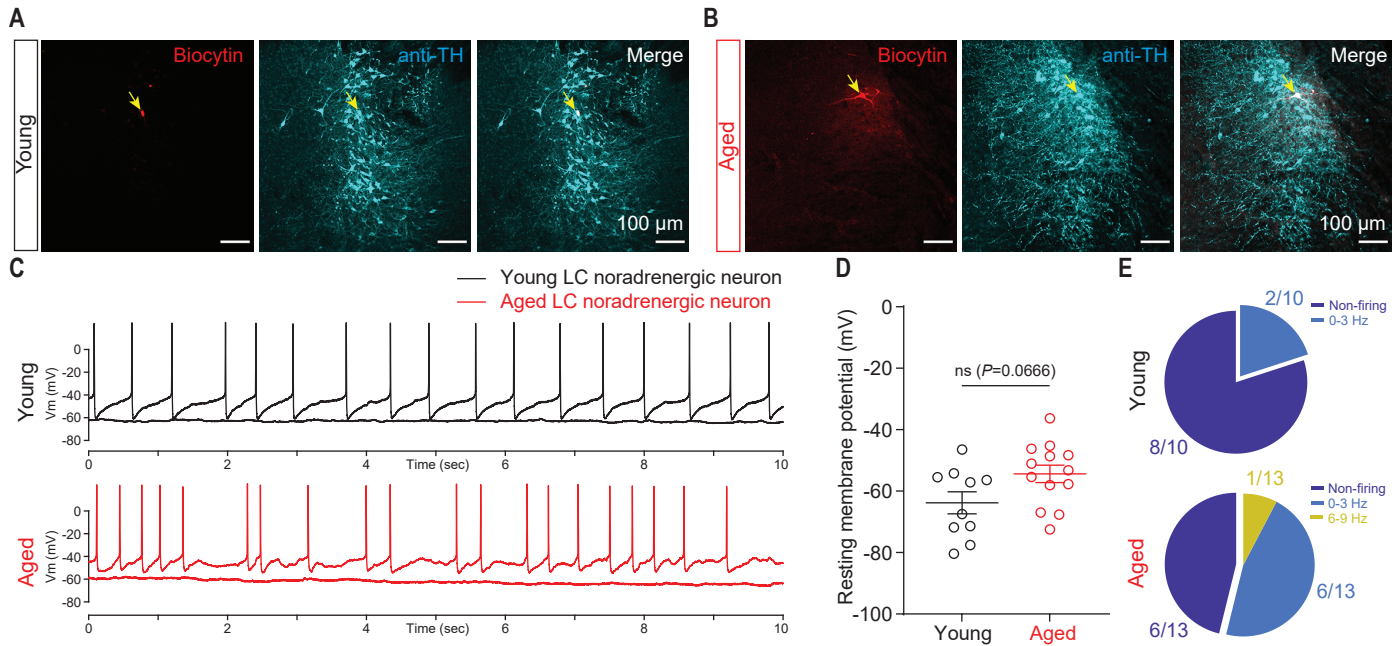

**fig. S14. Higher spontaneous activity in aged LC NA neurons.** (A) A representative slice from a young wild type mouse showing a patch clamp recorded neuron filled with biocytin and tyrosine hydroxylase (TH) antibody staining. (B) A representative slice from an aged wild type mouse showing a patch clamp recorded neuron filled with biocytin and TH antibody staining. (C) Representative recorded traces from (top) young and (bottom) aged LC NA neurons respectively. (D) Comparison of RMPs between young and aged LC NA neurons (Mann-Whitney  $U$  test; young:  $n = 10$  neurons from three mice versus aged:  $n = 13$  neurons from three mice). (E) Fractions of neurons with different firing frequencies for young and aged LC NA neurons. Only biocytin-labeled neurons co-stained with TH antibody were used for data analyses.

**Supplementary Text**

Details on statistical analyses

Statistical significance abbreviations: ns (not significant)  $P>0.05$ , \* $P<0.05$ , \*\* $P<0.01$ , \*\*\* $P<0.005$ ,\*\*\*\* $P<0.001$ , † $P<0.0005$ .**MAIN FIGURES****Fig. 1**

| Panel                                                                  | Data                                                        | Group size                   | Statistic method                                | Comparison              | P value | Notation | F/t statistic |
|------------------------------------------------------------------------|-------------------------------------------------------------|------------------------------|-------------------------------------------------|-------------------------|---------|----------|---------------|
| Fig. 1C. right middle                                                  | G <sup>S</sup> transient peak                               | Young: n=128 vs. Aged: n=171 | Unpaired <i>t</i> -test with Welch's correction | Young versus (vs.) Aged | <0.0001 | †        | t=10.59       |
|                                                                        | G <sup>S</sup> transient duration                           | Young: n=128 vs. Aged: n=171 | Unpaired <i>t</i> -test with Welch's correction | Young vs. Aged          | <0.0001 | †        | t=6.913       |
| Fig. 1C. right bottom left                                             | G <sup>S</sup> Z score                                      | n=6/group                    | Unpaired <i>t</i> -test with Welch's correction | Young vs. Aged          | 0.0022  | ***      | t=4.293       |
| Fig. 1C. right bottom right                                            | G <sup>S</sup> transient frequency                          | n=6/group                    | Unpaired <i>t</i> -test with Welch's correction | Young vs. Aged          | 0.0612  | ns       | t=2.161       |
| Fig. 1D right middle                                                   | G <sup>W</sup> epoch peak                                   | Young: n=102 vs. Aged: n=137 | Unpaired <i>t</i> -test with Welch's correction | Young vs. Aged          | <0.0001 | †        | t=6.357       |
|                                                                        | G <sup>W</sup> epoch duration                               | Young: n=102 vs. Aged: n=137 | Unpaired <i>t</i> -test with Welch's correction | Young vs. Aged          | 0.0061  | **       | t=2.787       |
| Fig. 1D. right bottom left                                             | G <sup>W</sup> Z score                                      | n=6/group                    | Unpaired <i>t</i> -test with Welch's correction | Young vs. Aged          | 0.0196  | *        | t=2.852       |
| Fig. 1D. right bottom right                                            | G <sup>W</sup> transient frequency                          | n=6/group                    | Unpaired <i>t</i> -test with Welch's correction | Young vs. Aged          | 0.0035  | ***      | t=4.286       |
| Fig. 1E                                                                | Animal-based averaged duration of, sleep, wake, S-W episode | n=6/group                    | Unpaired <i>t</i> -test with Welch's correction | Sleep Y vs. A           | 0.0328  | *        | t=2.504       |
|                                                                        |                                                             |                              |                                                 | Wake Y vs. A            | 0.0110  | *        | t=3.151       |
|                                                                        |                                                             |                              |                                                 | S-W episode Y vs. A     | 0.0007  | ****     | t=5.911       |
| Fig. 1F. G <sup>W</sup> epoch count/h against mean sleep bout duration | Young                                                       | n=6/group                    | Pearson correlation, linear fit                 | Slope vs. zero          | 0.2764  | ns       | F=1.586       |
|                                                                        | Aged                                                        | n=6/group                    |                                                 | Slope vs. zero          | 0.0372  | *        | F=9.447       |
|                                                                        | Pooled                                                      | n=6/group                    |                                                 | Slope vs. zero          | 0.0015  | ***      | F=18.70       |

**Fig. 2**

| Panel        | Data                                                                              | Group size          | Statistic method           | Comparison condition | P value | Notation | F/t statistic |
|--------------|-----------------------------------------------------------------------------------|---------------------|----------------------------|----------------------|---------|----------|---------------|
| Fig. 2B      | Latency for NREM-to-wake transition across stimulation parameters: Young vs. Aged | n=8 mice each group | Mann-Whitney <i>U</i> test | 1 mW, 1 Hz           | 0.39782 | ns       | N/A           |
|              |                                                                                   |                     |                            | 1 mW, 5 Hz           | 0.00047 | †        | N/A           |
|              |                                                                                   |                     |                            | 1 mW, 10 Hz          | 0.00404 | ***      | N/A           |
|              |                                                                                   |                     |                            | 1 mW, 15 Hz          | 0.00995 | **       | N/A           |
|              |                                                                                   |                     |                            | 1 mW, 20 Hz          | 0.00917 | **       | N/A           |
|              |                                                                                   |                     |                            | 5 mW, 1 Hz           | 0.00016 | †        | N/A           |
|              |                                                                                   |                     |                            | 5 mW, 5 Hz           | 0.00016 | †        | N/A           |
|              |                                                                                   |                     |                            | 5 mW, 10 Hz          | 0.00031 | †        | N/A           |
|              |                                                                                   |                     |                            | 5 mW, 15 Hz          | 0.00047 | †        | N/A           |
|              |                                                                                   |                     |                            | 5 mW, 20 Hz          | 0.01772 | *        | N/A           |
|              |                                                                                   |                     |                            | 10 mW, 1 Hz          | 0.00062 | ****     | N/A           |
|              |                                                                                   |                     |                            | 10 mW, 5 Hz          | 0.00870 | **       | N/A           |
|              |                                                                                   |                     |                            | 10 mW, 10 Hz         | 0.42735 | ns       | N/A           |
|              |                                                                                   |                     |                            | 10 mW, 15 Hz         | 0.17591 | ns       | N/A           |
| 10 mW, 20 Hz | 0.00016                                                                           | †                   | N/A                        |                      |         |          |               |



|         |                                                                                                                 |                     |                            |                |         |      |     |
|---------|-----------------------------------------------------------------------------------------------------------------|---------------------|----------------------------|----------------|---------|------|-----|
|         |                                                                                                                 |                     |                            | 15 mW, 1 Hz    | 0.00311 | ***  | N/A |
|         |                                                                                                                 |                     |                            | 15 mW, 5 Hz    | 0.01103 | *    | N/A |
|         |                                                                                                                 |                     |                            | 15 mW, 10 Hz   | 0.42346 | ns   | N/A |
|         |                                                                                                                 |                     |                            | 15 mW, 15 Hz   | 0.05252 | ns   | N/A |
|         |                                                                                                                 |                     |                            | 15 mW, 20 Hz   | 0.00016 | †    | N/A |
|         |                                                                                                                 |                     |                            | 20 mW, 1 Hz    | 0.00016 | †    | N/A |
|         |                                                                                                                 |                     |                            | 20 mW, 5 Hz    | 0.08500 | ns   | N/A |
|         |                                                                                                                 |                     |                            | 20 mW, 10 Hz   | 0.00016 | †    | N/A |
|         |                                                                                                                 |                     |                            | 20 mW, 15 Hz   | 0.00016 | †    | N/A |
|         |                                                                                                                 |                     |                            | 20 mW, 20 Hz   | 0.00031 | †    | N/A |
| Fig. 2C | Data in panel B aggregated for individual animal                                                                | n=8 mice each group | Mann-Whitney <i>U</i> test | Young vs. Aged | 0.10490 | ns   | N/A |
| Fig. 2E | Wake duration following optogenetic stimulation during NREM sleep across stimulation parameters: Young vs. Aged | n=8 mice each group | Mann-Whitney <i>U</i> test | 1 mW, 1 Hz     | 0.38928 | ns   | N/A |
|         |                                                                                                                 |                     |                            | 1 mW, 5 Hz     | 0.00016 | †    | N/A |
|         |                                                                                                                 |                     |                            | 1 mW, 10 Hz    | 0.00016 | †    | N/A |
|         |                                                                                                                 |                     |                            | 1 mW, 15 Hz    | 0.00016 | †    | N/A |
|         |                                                                                                                 |                     |                            | 1 mW, 20 Hz    | 0.00062 | **** | N/A |
|         |                                                                                                                 |                     |                            | 5 mW, 1 Hz     | 0.02999 | *    | N/A |
|         |                                                                                                                 |                     |                            | 5 mW, 5 Hz     | 0.00031 | †    | N/A |
|         |                                                                                                                 |                     |                            | 5 mW, 10 Hz    | 0.57374 | ns   | N/A |
|         |                                                                                                                 |                     |                            | 5 mW, 15 Hz    | 0.09883 | ns   | N/A |
|         |                                                                                                                 |                     |                            | 5 mW, 20 Hz    | 0.13038 | ns   | N/A |
|         |                                                                                                                 |                     |                            | 10 mW, 1 Hz    | 0.00062 | **** | N/A |
|         |                                                                                                                 |                     |                            | 10 mW, 5 Hz    | 0.04988 | *    | N/A |
|         |                                                                                                                 |                     |                            | 10 mW, 10 Hz   | 0.00699 | **   | N/A |
|         |                                                                                                                 |                     |                            | 10 mW, 15 Hz   | 0.00031 | †    | N/A |
|         |                                                                                                                 |                     |                            | 10 mW, 20 Hz   | 0.00295 | ***  | N/A |
|         |                                                                                                                 |                     |                            | 15 mW, 1 Hz    | 0.00062 | **** | N/A |
|         |                                                                                                                 |                     |                            | 15 mW, 5 Hz    | 0.03015 | *    | N/A |
|         |                                                                                                                 |                     |                            | 15 mW, 10 Hz   | 0.01476 | *    | N/A |
|         |                                                                                                                 |                     |                            | 15 mW, 15 Hz   | 0.00016 | †    | N/A |
|         |                                                                                                                 |                     |                            | 15 mW, 20 Hz   | 0.04056 | *    | N/A |
|         |                                                                                                                 |                     |                            | 20 mW, 1 Hz    | 0.00031 | †    | N/A |
|         |                                                                                                                 |                     |                            | 20 mW, 5 Hz    | 0.00124 | ***  | N/A |
|         |                                                                                                                 |                     |                            | 20 mW, 10 Hz   | 0.00124 | ***  | N/A |
|         |                                                                                                                 |                     |                            | 20 mW, 15 Hz   | 0.01476 | *    | N/A |
|         |                                                                                                                 |                     |                            | 20 mW, 20 Hz   | 0.02067 | *    | N/A |
| Fig. 2F | Data in panel E aggregated for individual animal                                                                | n=8 mice each group | Mann-Whitney <i>U</i> test | Young vs. Aged | 0.00020 | †    | N/A |
| Fig. 2H | Latency for REM-to-wake transition across stimulation parameters: Young vs. Aged                                | n=8 mice each group | Mann-Whitney <i>U</i> test | 1 mW, 1 Hz     | 0.98135 | ns   | N/A |
|         |                                                                                                                 |                     |                            | 1 mW, 5 Hz     | 0.00373 | ***  | N/A |
|         |                                                                                                                 |                     |                            | 1 mW, 10 Hz    | 0.45082 | ns   | N/A |
|         |                                                                                                                 |                     |                            | 1 mW, 15 Hz    | 0.43761 | ns   | N/A |
|         |                                                                                                                 |                     |                            | 1 mW, 20 Hz    | 0.14126 | ns   | N/A |
|         |                                                                                                                 |                     |                            | 5 mW, 1 Hz     | 0.00016 | †    | N/A |
|         |                                                                                                                 |                     |                            | 5 mW, 5 Hz     | 0.00016 | †    | N/A |
|         |                                                                                                                 |                     |                            | 5 mW, 10 Hz    | 0.00342 | ***  | N/A |
|         |                                                                                                                 |                     |                            | 5 mW, 15 Hz    | 0.00249 | ***  | N/A |
|         |                                                                                                                 |                     |                            | 5 mW, 20 Hz    | 0.00016 | †    | N/A |
|         |                                                                                                                 |                     |                            | 10 mW, 1 Hz    | 0.00016 | †    | N/A |
|         |                                                                                                                 |                     |                            | 10 mW, 5 Hz    | 0.00218 | ***  | N/A |
|         |                                                                                                                 |                     |                            | 10 mW, 10 Hz   | 0.01243 | *    | N/A |
|         |                                                                                                                 |                     |                            | 10 mW, 15 Hz   | 0.05284 | ns   | N/A |
|         |                                                                                                                 |                     |                            | 10 mW, 20 Hz   | 0.00016 | †    | N/A |
|         |                                                                                                                 |                     |                            | 15 mW, 1 Hz    | 0.01927 | *    | N/A |

|         |                                                                                                                |                     |                            |                |         |      |     |
|---------|----------------------------------------------------------------------------------------------------------------|---------------------|----------------------------|----------------|---------|------|-----|
|         |                                                                                                                |                     |                            | 15 mW, 5 Hz    | 0.05221 | ns   | N/A |
|         |                                                                                                                |                     |                            | 15 mW, 10 Hz   | 0.07397 | ns   | N/A |
|         |                                                                                                                |                     |                            | 15 mW, 15 Hz   | 0.01445 | *    | N/A |
|         |                                                                                                                |                     |                            | 15 mW, 20 Hz   | 0.00218 | †    | N/A |
|         |                                                                                                                |                     |                            | 20 mW, 1 Hz    | 0.00016 | ***  | N/A |
|         |                                                                                                                |                     |                            | 20 mW, 5 Hz    | 0.07280 | ns   | N/A |
|         |                                                                                                                |                     |                            | 20 mW, 10 Hz   | 0.59036 | ns   | N/A |
|         |                                                                                                                |                     |                            | 20 mW, 15 Hz   | 0.00093 | **** | N/A |
|         |                                                                                                                |                     |                            | 20 mW, 20 Hz   | 0.00171 | ***  | N/A |
| Fig. 2I | Data in panel H aggregated for individual animal                                                               | n=8 mice each group | Mann-Whitney <i>U</i> test | Young vs. Aged | 0.00470 | ***  | N/A |
| Fig. 2K | Wake duration following optogenetic stimulation during REM sleep across stimulation parameters: Young vs. Aged | n=8 mice each group | Mann-Whitney <i>U</i> test | 1 mW, 1 Hz     | 0.56923 | ns   | N/A |
|         |                                                                                                                |                     |                            | 1 mW, 5 Hz     | 0.00016 | †    | N/A |
|         |                                                                                                                |                     |                            | 1 mW, 10 Hz    | 0.00016 | †    | N/A |
|         |                                                                                                                |                     |                            | 1 mW, 15 Hz    | 0.01041 | *    | N/A |
|         |                                                                                                                |                     |                            | 1 mW, 20 Hz    | 0.00016 | †    | N/A |
|         |                                                                                                                |                     |                            | 5 mW, 1 Hz     | 0.00948 | **   | N/A |
|         |                                                                                                                |                     |                            | 5 mW, 5 Hz     | 0.00016 | †    | N/A |
|         |                                                                                                                |                     |                            | 5 mW, 10 Hz    | 0.00047 | †    | N/A |
|         |                                                                                                                |                     |                            | 5 mW, 15 Hz    | 0.00047 | †    | N/A |
|         |                                                                                                                |                     |                            | 5 mW, 20 Hz    | 0.00016 | †    | N/A |
|         |                                                                                                                |                     |                            | 10 mW, 1 Hz    | 0.02191 | *    | N/A |
|         |                                                                                                                |                     |                            | 10 mW, 5 Hz    | 0.00186 | ***  | N/A |
|         |                                                                                                                |                     |                            | 10 mW, 10 Hz   | 0.00016 | †    | N/A |
|         |                                                                                                                |                     |                            | 10 mW, 15 Hz   | 0.00420 | ***  | N/A |
|         |                                                                                                                |                     |                            | 10 mW, 20 Hz   | 0.01041 | *    | N/A |
|         |                                                                                                                |                     |                            | 15 mW, 1 Hz    | 0.00031 | †    | N/A |
|         |                                                                                                                |                     |                            | 15 mW, 5 Hz    | 0.00016 | †    | N/A |
|         |                                                                                                                |                     |                            | 15 mW, 10 Hz   | 0.05315 | ns   | N/A |
|         |                                                                                                                |                     |                            | 15 mW, 15 Hz   | 0.01041 | *    | N/A |
|         |                                                                                                                |                     |                            | 15 mW, 20 Hz   | 0.00016 | †    | N/A |
|         |                                                                                                                |                     |                            | 20 mW, 1 Hz    | 0.00016 | †    | N/A |
|         |                                                                                                                |                     |                            | 20 mW, 5 Hz    | 0.00016 | †    | N/A |
|         |                                                                                                                |                     |                            | 20 mW, 10 Hz   | 0.00295 | ***  | N/A |
|         |                                                                                                                |                     |                            | 20 mW, 15 Hz   | 0.00016 | †    | N/A |
|         |                                                                                                                |                     |                            | 20 mW, 20 Hz   | 0.00109 | ***  | N/A |
| Fig. 2L | Data in panel K aggregated for individual animal                                                               | n=8 mice each group | Mann-Whitney <i>U</i> test | Young vs. Aged | 0.00020 | †    | N/A |

**Fig. 3**

| Panel   | Data                                 | Group size                | Statistic method           | Comparison     | <i>P</i> value | Notation | F/t statistic |
|---------|--------------------------------------|---------------------------|----------------------------|----------------|----------------|----------|---------------|
| Fig. 3D | Input resistance                     | Young: n=33<br>Aged: n=21 | Mann-Whitney <i>U</i> test | Young vs. Aged | 0.4488         | ns       | N/A           |
| Fig. 3E | Resting membrane potential           | Young: n=33<br>Aged: n=21 | Mann-Whitney <i>U</i> test | Young vs. Aged | 0.0165         | *        | N/A           |
| Fig. 3F | Firing threshold                     | Young: n=12<br>Aged: n=9  | Mann-Whitney <i>U</i> test | Young vs. Aged | 0.5660         | ns       | N/A           |
| Fig. 3G | Difference between RMP and threshold | Young: n=12<br>Aged: n=9  | Mann-Whitney <i>U</i> test | Young vs. Aged | 0.0056         | **       | N/A           |
| Fig. 3H | Amplitude of AP                      | Young: n=12<br>Aged: n=9  | Mann-Whitney <i>U</i> test | Young vs. Aged | 0.0339         | *        | N/A           |
| Fig. 3I | Risetime of AP                       | Young: n=12<br>Aged: n=9  | Mann-Whitney <i>U</i> test | Young vs. Aged | 0.2773         | ns       | N/A           |
| Fig. 3J | Half duration of AP                  | Young: n=12<br>Aged: n=9  | Mann-Whitney <i>U</i> test | Young vs. Aged | 0.5538         | ns       | N/A           |

|         |                                                    |                           |                                       |                       |         |    |                       |
|---------|----------------------------------------------------|---------------------------|---------------------------------------|-----------------------|---------|----|-----------------------|
| Fig. 3K | Max. rising slope                                  | Young: n=12<br>Aged: n=9  | Mann-Whitney <i>U</i> test            | Young vs. Aged        | 0.1694  | ns | N/A                   |
| Fig. 3L | Max. decaying slope                                | Young: n=12<br>Aged: n=9  | Mann-Whitney <i>U</i> test            | Young vs. Aged        | 0.3544  | ns | N/A                   |
| Fig. 3N | Response attenuation upon optogenetic stimulations | Young: n=23<br>Aged: n=21 | Two-way ANOVA                         | Stimulation frequency | <0.0001 | †  | $F_{(4, 206)}=32.18$  |
|         |                                                    |                           |                                       | Age                   | <0.0001 | †  | $F_{(1, 206)}=17.69$  |
|         |                                                    |                           |                                       | Interaction           | 0.8059  | ns | $F_{(4, 206)}=0.8059$ |
|         |                                                    |                           | Post-hoc Šidák's multiple comparisons | 1 Hz                  | 0.9728  | ns | t=0.6541              |
|         |                                                    |                           |                                       | 5 Hz                  | 0.3049  | ns | t=1.820               |
|         |                                                    |                           |                                       | 10 Hz                 | 0.0158  | *  | t=2.985               |
|         |                                                    |                           |                                       | 15 Hz                 | 0.0638  | ns | t=2.503               |
| 20 Hz   | 0.5438                                             | ns                        | t=1.462                               |                       |         |    |                       |
| Fig. 3O | Spikelets upon step current injection              | Young: n=33<br>Aged: n=26 | Two-way ANOVA                         | Current               | <0.0001 | †  | $F_{(7, 454)}=15.09$  |
|         |                                                    |                           |                                       | Age                   | <0.0001 | †  | $F_{(1, 454)}=26.41$  |
|         |                                                    |                           |                                       | Interaction           | 0.1413  | ns | $F_{(7, 454)}=1.573$  |
|         |                                                    |                           | Post-hoc Šidák's multiple comparisons | -50 pA                | >0.9999 | ns | t=0.03566             |
|         |                                                    |                           |                                       | 0 pA                  | >0.9999 | ns | t=0.3015              |
|         |                                                    |                           |                                       | 50 pA                 | 0.6762  | ns | t=1.511               |
|         |                                                    |                           |                                       | 100 pA                | 0.0344  | *  | t=2.865               |
|         |                                                    |                           |                                       | 150 pA                | 0.0242  | *  | t=2.978               |
|         |                                                    |                           |                                       | 200 pA                | 0.0176  | *  | t=3.077               |
|         |                                                    |                           |                                       | 250 pA                | 0.0488  | *  | t=2.748               |
| 300 pA  | 0.9427                                             | ns                        | t=1.037                               |                       |         |    |                       |

Fig. 4

| Panel                 | Data                       | Group size         | Statistic method                                | Comparison                  | <i>P</i> value | Notation | F/q statistic |
|-----------------------|----------------------------|--------------------|-------------------------------------------------|-----------------------------|----------------|----------|---------------|
| Fig. 4B               | Resting membrane potential | n=19               | Wilcoxon matched-pairs signed rank test         | ACSF vs. XE991              | 0.0012         | ***      | N/A           |
| Fig. 4C               | Firing rate                | n=19               | Wilcoxon matched-pairs signed rank test         | ACSF vs. XE991              | 0.0078         | **       | N/A           |
| Fig. 4E               | Resting membrane potential | n=8                | RM one-way ANOVA                                | Across treatments           | <0.0001        | †        | F=64.13       |
|                       |                            |                    | Post-hoc Tukey's multiple comparisons           | ACSF vs. solvent            | 0.0509         | ns       | q=4.146       |
|                       |                            |                    |                                                 | ACSF vs. Flup               | <0.0001        | †        | q=14.65       |
|                       |                            |                    |                                                 | Solvent vs. Flup            | 0.0006         | ****     | q=9.597       |
| Fig. 4F               | Firing rate                | n=8                | RM one-way ANOVA                                | Across treatments           | 0.0072         | **       | F=11.82       |
|                       |                            |                    | Post-hoc Tukey's multiple comparisons           | ACSF vs. solvent            | 0.0725         | ns       | q=3.781       |
|                       |                            |                    |                                                 | ACSF vs. Flup               | 0.0210         | *        | q=5.087       |
|                       |                            |                    |                                                 | Solvent vs. Flup            | 0.0294         | *        | q=4.724       |
| Fig. 4G. right top    | Young Hcrt M current       | n=6                | Paired <i>t</i> -test                           | Before vs. after XE991      | 0.0048         | ***      | t=4.824       |
| Fig. 4G. right bottom | Young Hcrt M current       | n=10               | Paired <i>t</i> -test                           | Before vs. after Flupirtine | 0.0409         | *        | t=2.385       |
| Fig. 4H. right top    | Aged Hcrt M current        | n=7                | Paired <i>t</i> -test                           | Before vs. after XE991      | 0.1799         | ns       | t=1.518       |
| Fig. 4H. right bottom | Aged Hcrt M current        | n=15               | Paired <i>t</i> -test                           | Before vs. after Flupirtine | 0.0002         | †        | t=4.981       |
| Fig. 4I               | Basal M current            | Y: n=25<br>A: n=26 | Unpaired <i>t</i> -test with Welch's correction | Young vs. Aged              | 0.0403         | *        | t=2.123       |
| Fig. 4J. right        | KCNQ2 quantification       | n=4 each group     | Paired <i>t</i> -test                           | Young vs. Aged              | 0.0495         | *        | t=3.196       |

Fig. 5

| Panel                         | Data                  | Group size      | Statistic method                 | Comparison              | P value  | Notation | F/t statistic          |
|-------------------------------|-----------------------|-----------------|----------------------------------|-------------------------|----------|----------|------------------------|
| Fig. 5B. Week1 top panel 1    | Wake amount/2h        | n=10 each group | Two-way RM ANOVA, Post-hoc Šidák | Main effect of group    | 0.6969   | ns       | $F_{(1, 18)}=0.1567$   |
| Fig. 5B. Week1 top panel 2    | Wake bout count/2h    | n=10 each group | Two-way RM ANOVA, Post-hoc Šidák | Main effect of group    | 0.8736   | ns       | $F_{(1, 18)}=0.02606$  |
| Fig. 5B. Week1 top panel 3    | Mean wake bout length | n=10 each group | Two-way RM ANOVA, Post-hoc Šidák | Main effect of group    | 0.4600   | ns       | $F_{(1, 18)}=0.5701$   |
| Fig. 5B. Week1 top panel 4    | Mean wake bout length | n=10 each group | Holm-Šidák                       | 48 hour                 | 0.8668   | ns       | t=0.1702               |
|                               |                       |                 |                                  | Light                   | 0.6553   | ns       | t=0.4539               |
|                               |                       |                 |                                  | Dark                    | 0.7029   | ns       | t=0.3880               |
| Fig. 5B. Week1 middle panel 1 | NREM amount/2h        | n=10 each group | Two-way RM ANOVA, Post-hoc Šidák | Main effect of group    | 0.7216   | ns       | $F_{(1, 18)}=0.1311$   |
| Fig. 5B. Week1 middle panel 2 | NREM bout count/2h    | n=10 each group | Two-way RM ANOVA, Post-hoc Šidák | Main effect of group    | 0.8840   | ns       | $F_{(1, 18)}=0.02191$  |
| Fig. 5B. Week1 middle panel 3 | Mean NREM bout length | n=10 each group | Two-way RM ANOVA, Post-hoc Šidák | Main effect of group    | 0.7202   | ns       | $F_{(1, 18)}=0.1324$   |
| Fig. 5B. Week1 middle panel 4 | Mean NREM bout length | n=10 each group | Holm-Šidák                       | 48 hour                 | 0.6962   | ns       | t=0.3968               |
|                               |                       |                 |                                  | Light                   | 0.7366   | ns       | t=0.3416               |
|                               |                       |                 |                                  | Dark                    | 0.9847   | ns       | t=0.01948              |
| Fig. 5B. Week1 bottom panel 1 | REM amount/2h         | n=10 each group | Two-way RM ANOVA, Post-hoc Šidák | Main effect of group    | 0.8387   | ns       | $F_{(1, 18)}=0.04263$  |
| Fig. 5B. Week1 bottom panel 2 | REM bout count/2h     | n=10 each group | Two-way RM ANOVA, Post-hoc Šidák | Main effect of group    | 0.8594   | ns       | $F_{(1, 18)}=0.03229$  |
| Fig. 5B. Week1 bottom panel 3 | Mean REM bout length  | n=10 each group | Two-way RM ANOVA, Post-hoc Šidák | Main effect of group    | 0.9519   | ns       | $F_{(1, 18)}=0.003740$ |
| Fig. 5B. Week1 bottom panel 4 | Mean REM bout length  | n=10 each group | Holm-Šidák                       | 48 hour                 | 0.9471   | ns       | t=0.06733              |
|                               |                       |                 |                                  | Light                   | 0.8476   | ns       | t=0.1950               |
|                               |                       |                 |                                  | Dark                    | 0.8366   | ns       | t=0.2093               |
| Fig. 5B. Week8 top panel 1    | Wake amount/2h        | n=10 each group | Two-way RM ANOVA, Post-hoc Šidák | Main effect of group    | 0.6385   | ns       | $F_{(1, 18)}=0.2283$   |
| Fig. 5B. Week8 top panel 2    | Wake bout count/2h    | n=10 each group | Two-way RM ANOVA, Post-hoc Šidák | Main effect of group    | 0.0019   | ***      | $F_{(1, 18)}=13.16$    |
| Fig. 5B. Week8 top panel 3    | Mean wake bout length | n=10 each group | Two-way RM ANOVA, Post-hoc Šidák | Main effect of group    | 0.5679   | ns       | $F_{(1, 18)}=0.3386$   |
| Fig. 5B. Week8 top panel 4    | Mean wake bout length | n=10 each group | Holm-Šidák                       | 48 hour                 | 0.04055  | *        | t=2.207                |
|                               |                       |                 |                                  | Light                   | 0.1274   | ns       | t=1.598                |
|                               |                       |                 |                                  | Dark                    | 0.1068   | ns       | t=1.698                |
| Fig. 5B. Week8 middle panel 1 | NREM amount/2h        | n=10 each group | Two-way RM ANOVA, Post-hoc Šidák | Main effect of group    | 0.5398   | ns       | $F_{(1, 18)}=0.3907$   |
| Fig. 5B. Week8 middle panel 2 | NREM bout count/2h    | n=10 each group | Two-way RM ANOVA, Post-hoc Šidák | Main effect of group    | 0.0030   | ***      | $F_{(1, 18)}=11.74$    |
| Fig. 5B. Week8 middle panel 3 | Mean NREM bout length | n=10 each group | Two-way RM ANOVA, Post-hoc Šidák | Main effect of group    | <0.0001  | †        | $F_{(1, 18)}=37.29$    |
| Fig. 5B. Week8 middle panel 4 | Mean NREM bout length | n=10 each group | Holm-Šidák                       | 48 hour                 | <0.0001  | †        | t=5.085                |
|                               |                       |                 |                                  | Light                   | 0.000157 | †        | t=4.760                |
|                               |                       |                 |                                  | Dark                    | 0.002341 | ***      | t=3.540                |
| Fig. 5B. Week8 bottom panel 1 | REM amount/2h         | n=10 each group | Two-way RM ANOVA, Post-hoc Šidák | Main effect of group    | 0.6737   | ns       | $F_{(1, 18)}=0.1833$   |
| Fig. 5B. Week8 bottom panel 2 | REM bout count/2h     | n=10 each group | Two-way RM ANOVA, Post-hoc Šidák | Main effect of group    | 0.3055   | ns       | $F_{(1, 18)}=1.112$    |
| Fig. 5B. Week8 bottom panel 3 | Mean REM bout length  | n=10 each group | Two-way RM ANOVA, Post-hoc Šidák | Main effect of group    | 0.7868   | ns       | $F_{(1, 18)}=0.07540$  |
| Fig. 5B. Week8 bottom panel 4 | Mean REM bout length  | n=10 each group | Holm-Šidák                       | 48 hour                 | 0.1716   | ns       | t=1.424                |
|                               |                       |                 |                                  | Light                   | 0.1061   | ns       | t=1.701                |
|                               |                       |                 |                                  | Dark                    | 0.8467   | ns       | t=0.1961               |
| Fig. 5D                       | RMP                   | n=14 each group | Mann-Whitney U test              | sgControl vs. sgKcnc2/3 | 0.0122   | *        | N/A                    |

**Fig. 6**

| Panel                    | Data                                | Group size | Statistic method                               | Comparison  | P value | Notation | F/t statistic                  |
|--------------------------|-------------------------------------|------------|------------------------------------------------|-------------|---------|----------|--------------------------------|
| Fig. 6A.<br>Row1 Panel 1 | Wake quantification in young mice   | n=7        | Two-way mixed effects model,<br>Post-hoc Šidák | Time        | <0.0001 | †        | F <sub>(23, 276)</sub> =17.15  |
|                          |                                     |            |                                                | Treatment   | 0.8333  | ns       | F <sub>(1, 12)</sub> =0.04628  |
|                          |                                     |            |                                                | Interaction | 0.5378  | ns       | F <sub>(23, 276)</sub> =0.9452 |
| Fig. 6A.<br>Row1 Panel 2 | NREM quantification in young mice   | n=7        | Two-way mixed effects model,<br>Post-hoc Šidák | Time        | <0.0001 | †        | F <sub>(23, 276)</sub> =16.21  |
|                          |                                     |            |                                                | Treatment   | 0.8143  | ns       | F <sub>(1, 12)</sub> =0.05762  |
|                          |                                     |            |                                                | Interaction | 0.5191  | ns       | F <sub>(23, 276)</sub> =0.9591 |
| Fig. 6A.<br>Row1 Panel 3 | REM quantification in young mice    | n=7        | Two-way mixed effects model,<br>Post-hoc Šidák | Time        | <0.0001 | †        | F <sub>(23, 276)</sub> =15.15  |
|                          |                                     |            |                                                | Treatment   | 0.7977  | ns       | F <sub>(1, 12)</sub> =0.06867  |
|                          |                                     |            |                                                | Interaction | 0.5437  | ns       | F <sub>(23, 276)</sub> =0.9408 |
| Fig. 6A.<br>Row2 Panel 1 | Wake bout count in young mice       | n=7        | Two-way mixed effects model,<br>Post-hoc Šidák | Time        | <0.0001 | †        | F <sub>(23, 276)</sub> =10.34  |
|                          |                                     |            |                                                | Treatment   | 0.8007  | ns       | F <sub>(1, 12)</sub> =0.06662  |
|                          |                                     |            |                                                | Interaction | 0.6752  | ns       | F <sub>(23, 276)</sub> =0.8431 |
| Fig. 6A.<br>Row2 Panel 2 | NREM bout count in young mice       | n=7        | Two-way mixed effects model,<br>Post-hoc Šidák | Time        | 0.0001  | †        | F <sub>(23, 276)</sub> =11.28  |
|                          |                                     |            |                                                | Treatment   | 0.7160  | ns       | F <sub>(1, 12)</sub> =0.1388   |
|                          |                                     |            |                                                | Interaction | 0.6661  | ns       | F <sub>(23, 276)</sub> =0.8500 |
| Fig. 6A.<br>Row2 Panel 3 | REM bout count in young mice        | n=7        | Two-way mixed effects model,<br>Post-hoc Šidák | Time        | <0.0001 | †        | F <sub>(23, 276)</sub> =13.85  |
|                          |                                     |            |                                                | Treatment   | 0.3511  | ns       | F <sub>(1, 12)</sub> =0.9413   |
|                          |                                     |            |                                                | Interaction | 0.0734  | ns       | F <sub>(23, 276)</sub> =1.488  |
| Fig. 6A.<br>Row3 Panel 1 | Mean wake bout length in young mice | n=7        | Two-way mixed effects model,<br>Post-hoc Šidák | Time        | <0.0001 | †        | F <sub>(23, 230)</sub> =7.920  |
|                          |                                     |            |                                                | Treatment   | 0.9289  | ns       | F <sub>(1, 12)</sub> =0.008296 |
|                          |                                     |            |                                                | Interaction | 0.8540  | ns       | F <sub>(23, 276)</sub> =0.6909 |
| Fig. 6A.<br>Row3 Panel 2 | Mean NREM bout length in young mice | n=7        | Two-way mixed effects model,<br>Post-hoc Šidák | Time        | 0.0011  | ***      | F <sub>(23, 260)</sub> =4.613  |
|                          |                                     |            |                                                | Treatment   | 0.6774  | ns       | F <sub>(1, 12)</sub> =0.1735   |
|                          |                                     |            |                                                | Interaction | 0.4456  | ns       | F <sub>(23, 260)</sub> =1.016  |
| Fig. 6A.<br>Row3 Panel 3 | Mean REM bout length in young mice  | n=7        | Two-way mixed effects model,<br>Post-hoc Šidák | Time        | 0.0643  | ns       | F <sub>(23, 180)</sub> =1.534  |
|                          |                                     |            |                                                | Treatment   | 0.2584  | ns       | F <sub>(1, 12)</sub> =1.408    |
|                          |                                     |            |                                                | Interaction | 0.0168  | *        | F <sub>(23, 180)</sub> =1.814  |
| Fig. 6B.<br>Row1 Panel 1 | Wake quantification in aged mice    | n=6        | Two-way mixed effects model,<br>Post-hoc Šidák | Time        | <0.0001 | †        | F <sub>(23, 230)</sub> =10.48  |
|                          |                                     |            |                                                | Treatment   | 0.3343  | ns       | F <sub>(1, 10)</sub> =1.029    |
|                          |                                     |            |                                                | Interaction | 0.7784  | ns       | F <sub>(23, 230)</sub> =0.7601 |
| Fig. 6B.<br>Row1 Panel 2 | NREM quantification in aged mice    | n=6        | Two-way mixed effects model,<br>Post-hoc Šidák | Time        | <0.0001 | †        | F <sub>(23, 230)</sub> =9.977  |
|                          |                                     |            |                                                | Treatment   | 0.2593  | ns       | F <sub>(1, 10)</sub> =1.430    |
|                          |                                     |            |                                                | Interaction | 0.7492  | ns       | F <sub>(23, 230)</sub> =0.7845 |
| Fig. 6B.<br>Row1 Panel 3 | REM quantification in aged mice     | n=6        | Two-way mixed effects model,<br>Post-hoc Šidák | Time        | <0.0001 | †        | F <sub>(23, 230)</sub> =10.66  |
|                          |                                     |            |                                                | Treatment   | 0.7245  | ns       | F <sub>(1, 10)</sub> =0.1315   |
|                          |                                     |            |                                                | Interaction | 0.1686  | ns       | F <sub>(23, 230)</sub> =1.300  |
| Fig. 6B.<br>Row2 Panel 1 | Wake bout count in aged mice        | n=6        | Two-way mixed effects model,<br>Post-hoc Šidák | Time        | 0.0011  | ***      | F <sub>(23, 230)</sub> =4.036  |
|                          |                                     |            |                                                | Treatment   | 0.1616  | ns       | F <sub>(1, 10)</sub> =2.285    |
|                          |                                     |            |                                                | Interaction | 0.1602  | ns       | F <sub>(23, 230)</sub> =1.312  |
| Fig. 6B.<br>Row2 Panel 2 | NREM bout count in aged mice        | n=6        | Two-way mixed effects model,<br>Post-hoc Šidák | Time        | 0.0003  | †        | F <sub>(23, 230)</sub> =4.660  |
|                          |                                     |            |                                                | Treatment   | 0.1571  | ns       | F <sub>(1, 10)</sub> =2.339    |
|                          |                                     |            |                                                | Interaction | 0.1959  | ns       | F <sub>(23, 230)</sub> =1.261  |
| Fig. 6B.<br>Row3 Panel 3 | REM bout count in aged mice         | n=6        | Two-way mixed effects model,<br>Post-hoc Šidák | Time        | <0.0001 | †        | F <sub>(23, 230)</sub> =9.518  |
|                          |                                     |            |                                                | Treatment   | 0.5511  | ns       | F <sub>(1, 10)</sub> =0.3806   |
|                          |                                     |            |                                                | Interaction | 0.0746  | ns       | F <sub>(23, 230)</sub> =1.491  |
| Fig. 6B.<br>Row3 Panel 1 | Mean wake bout length in aged mice  | n=6        | Two-way mixed effects model,<br>Post-hoc Šidák | Time        | 0.0337  | *        | F <sub>(23, 230)</sub> =2.809  |
|                          |                                     |            |                                                | Treatment   | 0.8607  | ns       | F <sub>(1, 10)</sub> =0.03240  |
|                          |                                     |            |                                                | Interaction | 0.9615  | ns       | F <sub>(23, 230)</sub> =0.5350 |
| Fig. 6B.<br>Row3 Panel 2 | Mean NREM bout length in aged mice  | n=6        | Two-way mixed effects model,<br>Post-hoc Šidák | Time        | 0.0005  | ****     | F <sub>(23, 230)</sub> =4.820  |
|                          |                                     |            |                                                | Treatment   | 0.0200  | *        | F <sub>(1, 10)</sub> =7.636    |
|                          |                                     |            |                                                | Interaction | <0.0001 | †        | F <sub>(23, 228)</sub> =3.639  |
| Fig. 6B.<br>Row3 Panel 2 | Mean REM bout length in aged mice   | n=6        | Two-way mixed effects model,<br>Post-hoc Šidák | Time        | 0.4123  | ns       | F <sub>(23, 181)</sub> =1.020  |
|                          |                                     |            |                                                | Treatment   | 0.6743  | ns       | F <sub>(1, 10)</sub> =0.1873   |
|                          |                                     |            |                                                | Interaction | 0.7244  | ns       | F <sub>(23, 181)</sub> =0.8034 |
| Fig. 6G. left            | Band power                          | n=7        | Holm-Šidák                                     | Delta       | 0.6307  | ns       | t=0.4937                       |

|                 |            |     |            |       |         |    |          |
|-----------------|------------|-----|------------|-------|---------|----|----------|
|                 |            |     |            | Theta | 0.7331  | ns | t=0.3491 |
| Fig. 6G. middle | Band power | n=7 | Holm-Šidák | Delta | 0.3745  | ns | t=0.9225 |
|                 |            |     |            | Theta | 0.5943  | ns | t=0.5506 |
| Fig. 6G. right  | Band power | n=7 | Holm-Šidák | Delta | 0.1671  | ns | t=1.531  |
|                 |            |     |            | Theta | 0.8701  | ns | t=0.1672 |
| Fig. 6H. left   | Band power | n=6 | Holm-Šidák | Delta | 0.5244  | ns | t=0.6529 |
|                 |            |     |            | Theta | 0.2624  | ns | t=1.168  |
| Fig. 6H. middle | Band power | n=6 | Holm-Šidák | Delta | 0.05167 | ns | t=2.127  |
|                 |            |     |            | Theta | 0.01365 | *  | t=2.819  |
| Fig. 6H. right  | Band power | n=6 | Holm-Šidák | Delta | 0.3086  | ns | t=1.057  |
|                 |            |     |            | Theta | 0.04454 | *  | t=2.207  |

## SUPPLEMENTARY FIGURES

### fig. S1

| Panel    | Data                   | Group size     | Statistic method                       | Comparison           | P value   | Notation | F/q statistic        |
|----------|------------------------|----------------|----------------------------------------|----------------------|-----------|----------|----------------------|
| fig. S1A | Wake amount/h          | n=6 each group | Two-way RM ANOVA, Post-hoc Šidák       | Main effect of group | 0.0693    | ns       | $F_{(1, 10)}=8.229$  |
| fig. S1B | Wake bout count/h      | n=5 each group | Two-way RM ANOVA, Post-hoc Šidák       | Main effect of group | <0.0001   | †        | $F_{(1, 10)}=42.89$  |
| fig. S1C | Mean wake bout length  | n=6 each group | Two-way RM ANOVA, Post-hoc Šidák       | Main effect of group | 0.0008    | ****     | $F_{(1, 10)}=22.60$  |
| fig. S1D | Total wake bout length | n=6 each group | Holm-Šidák                             | 48 hour              | 0.01754   | *        | t=2.840              |
|          |                        |                |                                        | Light                | 0.7952    | ns       | t=0.2666             |
|          |                        |                |                                        | Dark                 | 0.004842  | ***      | t=3.601              |
| fig. S1E | Total wake bout count  | n=6 each group | Holm-Šidák                             | 48 hour              | <0.0001   | †        | t=8.872              |
|          |                        |                |                                        | Light                | 0.004348  | ***      | t=3.085              |
|          |                        |                |                                        | Dark                 | <0.0001   | †        | t=5.787              |
| fig. S1F | Mean wake bout length  | n=6 each group | Holm-Šidák                             | 48 hour              | 0.0009415 | ****     | t=4.626              |
|          |                        |                |                                        | Light                | 0.004970  | ***      | t=3.585              |
|          |                        |                |                                        | Dark                 | 0.003951  | ***      | t=3.724              |
| fig. S1G | NREM amount/h          | n=6 each group | Two-way RM ANOVA, Post-hoc Šidák       | Main effect of group | 0.0137    | *        | $F_{(1, 10)}=8.902$  |
| fig. S1H | NREM bout count/h      | n=6 each group | Two-way RM ANOVA, Post-hoc Šidák       | Main effect of group | <0.0001   | †        | $F_{(1, 10)}=45.83$  |
| fig. S1I | Mean NREM bout length  | n=6 each group | Two-way RM ANOVA, not applicable (N/A) | Main effect of group | N/A       | N/A      | N/A                  |
| fig. S1J | Total NREM bout length | n=6 each group | Holm-Šidák                             | 48 hour              | 0.01259   | *        | t=3.034              |
|          |                        |                |                                        | Light                | 0.7923    | ns       | t=0.2704             |
|          |                        |                |                                        | Dark                 | 0.002725  | ***      | t=3.951              |
| fig. S1K | Total NREM bout count  | n=6 each group | Holm-Šidák                             | 48 hour              | <0.0001   | †        | t=6.769              |
|          |                        |                |                                        | Light                | 0.0009419 | ****     | t=4.626              |
|          |                        |                |                                        | Dark                 | <0.0001   | †        | t=7.136              |
| fig. S1L | Mean NREM bout length  | n=6 each group | Holm-Šidák                             | 48 hour              | <0.0001   | †        | t=6.892              |
|          |                        |                |                                        | Light                | 0.0009381 | ****     | t=4.629              |
|          |                        |                |                                        | Dark                 | <0.0001   | †        | t=6.531              |
| fig. S1M | REM amount/h           | n=6 each group | Two-way RM ANOVA, Post-hoc Šidák       | Main effect of group | 0.5170    | ns       | $F_{(1, 10)}=0.4512$ |
| fig. S1N | REM bout count/h       | n=6 each group | Two-way RM ANOVA, Post-hoc Šidák       | Main effect of group | 0.3085    | ns       | $F_{(1, 10)}=1.151$  |
| fig. S1O | Mean REM bout length   | n=6 each group | Two-way RM ANOVA, not applicable (N/A) | Main effect of group | N/A       | N/A      | N/A                  |
| fig. S1P | Total REM bout length  | n=6 each group | Holm-Šidák                             | 48 hour              | 0.5120    | ns       | t=0.6798             |
|          |                        |                |                                        | Light                | 0.9875    | ns       | t=0.01607            |
|          |                        |                |                                        | Dark                 | 0.4113    | ns       | t=0.8573             |
| fig. S1Q | Total REM bout count   | n=6 each group | Holm-Šidák                             | 48 hour              | 0.3085    | ns       | t=1.073              |
|          |                        |                |                                        | Light                | >0.9999   | ns       | t=0                  |
|          |                        |                |                                        | Dark                 | 0.3219    | ns       | t=1.042              |

|          |                      |                |            |         |        |    |           |
|----------|----------------------|----------------|------------|---------|--------|----|-----------|
| fig. S1R | Mean REM bout length | n=6 each group | Holm-Šidák | 48 hour | 0.9750 | ns | t=0.03210 |
|          |                      |                |            | Light   | 0.9588 | ns | t=0.05293 |
|          |                      |                |            | Dark    | 0.8881 | ns | t=0.1443  |

fig. S2

| Panel           | Data              | Group size              | Statistic method             | Comparison                        | P value   | Notation | F/t statistic          |
|-----------------|-------------------|-------------------------|------------------------------|-----------------------------------|-----------|----------|------------------------|
| fig. S2E        | Hcrt neuron count | Young: n=6<br>Aged: n=6 | Two-way ANOVA                | Anterior-posterior location (APL) | <0.0001   | †        | $F_{(24, 250)}= 311.4$ |
|                 |                   |                         |                              | Age                               | <0.0001   | †        | $F_{(1, 250)}= 950.0$  |
|                 |                   |                         |                              | Interaction                       | <0.0001   | †        | $F_{(24, 250)}= 13.74$ |
|                 |                   |                         | Šidák's multiple comparisons | APL -1.000                        | <0.0001   | †        | t=6.359                |
|                 |                   |                         |                              | APL -1.035                        | 0.8011    | ns       | t=0.2586               |
|                 |                   |                         |                              | APL -1.070                        | 0.0006308 | ****     | t=4.892                |
|                 |                   |                         |                              | APL -1.105                        | <0.0001   | †        | t=6.248                |
|                 |                   |                         |                              | APL -1.140                        | <0.0001   | †        | t=7.628                |
|                 |                   |                         |                              | APL -1.175                        | <0.0001   | †        | t=6.814                |
|                 |                   |                         |                              | APL -1.210                        | <0.0001   | †        | t=8.256                |
|                 |                   |                         |                              | APL -1.245                        | <0.0001   | †        | t=9.862                |
|                 |                   |                         |                              | APL -1.280                        | <0.0001   | †        | t=8.695                |
|                 |                   |                         |                              | APL -1.315                        | <0.0001   | †        | t=9.085                |
|                 |                   |                         |                              | APL -1.350                        | <0.0001   | †        | t=7.579                |
|                 |                   |                         |                              | APL -1.385                        | 0.009288  | **       | t=3.213                |
|                 |                   |                         |                              | APL -1.420                        | <0.0001   | †        | t=9.663                |
|                 |                   |                         |                              | APL -1.455                        | <0.0001   | †        | t=9.900                |
|                 |                   |                         |                              | APL -1.490                        | <0.0001   | †        | t=11.84                |
|                 |                   |                         |                              | APL -1.525                        | <0.0001   | †        | t=10.15                |
|                 |                   |                         |                              | APL -1.560                        | <0.0001   | †        | t=7.541                |
|                 |                   |                         |                              | APL -1.595                        | 0.0007528 | ****     | t=4.774                |
|                 |                   |                         |                              | APL -1.630                        | <0.0001   | †        | t=9.516                |
|                 |                   |                         |                              | APL -1.665                        | <0.0001   | †        | t=6.355                |
| APL -1.700      | 0.01814           | *                       | t=2.821                      |                                   |           |          |                        |
| APL -1.735      | 0.002556          | ***                     | t=3.991                      |                                   |           |          |                        |
| APL -1.770      | 0.0007529         | ****                    | t=4.774                      |                                   |           |          |                        |
| APL -1.805      | 0.02011           | *                       | t=2.760                      |                                   |           |          |                        |
| APL -1.840      | 0.02628           | *                       | t=2.605                      |                                   |           |          |                        |
| fig. S2E. Inset | Hcrt neuron count | Young: n=6<br>Aged: n=6 | Unpaired t-test              | Young vs. Aged                    | <0.0001   | †        | t=20.09                |

fig. S3

| Panel    | Data                                               | Group size                      | Statistic method    | Comparison     | P value | Notation | F/t statistic |
|----------|----------------------------------------------------|---------------------------------|---------------------|----------------|---------|----------|---------------|
| fig. S3B | Chr2-eYFP+ cell count                              | Young: n = 8<br>vs. Aged: n = 8 | Mann-Whitney U test | Young vs. Aged | 0.0499  | *        | N/A           |
| fig. S3C | Percentage of Chr2-eYFP neurons positive for Hcrt1 | Young: n = 8<br>vs. Aged: n = 8 | Mann-Whitney U test | Young vs. Aged | 0.7209  | ns       | N/A           |

fig. S4

| Panel    | Data                   | Group size                | Statistic method                      | Comparison                 | P value | Notation | F/t statistic         |
|----------|------------------------|---------------------------|---------------------------------------|----------------------------|---------|----------|-----------------------|
| fig. S4C | PSC failure percentage | Young: n=15<br>Aged: n=18 | Two-way ANOVA                         | Stimulation Frequency (Hz) | <0.0001 | †        | $F_{(4, 153)}=14.87$  |
|          |                        |                           |                                       | Age                        | 0.0059  | **       | $F_{(1, 153)}=7.813$  |
|          |                        |                           |                                       | Interaction                | 0.8490  | ns       | $F_{(4, 153)}=0.3424$ |
|          |                        |                           | Post-hoc Šidák's multiple comparisons | 1 Hz                       | 0.9944  | ns       | t=0.4609              |
|          |                        |                           |                                       | 5 Hz                       | 0.8545  | ns       | t=0.9979              |
|          |                        |                           |                                       | 10 Hz                      | 0.7500  | ns       | t=1.174               |
|          |                        |                           |                                       | 15 Hz                      | 0.2477  | ns       | t=1.931               |
|          |                        |                           |                                       | 20 Hz                      | 0.3973  | ns       | t=1.673               |

**fig. S5**

| Panel    | Data       | Group size                   | Statistic method       | Comparison     | P value  | Notation |
|----------|------------|------------------------------|------------------------|----------------|----------|----------|
| fig. S5D | Hcrt       | Young: n=225 vs. Aged: n=129 | Wilcoxon rank-sum test | Young vs. Aged | 2.98e-11 | †        |
|          | Gm42418    | Young: n=225 vs. Aged: n=129 | Wilcoxon rank-sum test | Young vs. Aged | 3.73e-12 | †        |
|          | 6330403Rik | Young: n=225 vs. Aged: n=129 | Wilcoxon rank-sum test | Young vs. Aged | 1.02e-4  | †        |
|          | Peg3       | Young: n=225 vs. Aged: n=129 | Wilcoxon rank-sum test | Young vs. Aged | 4.68e-5  | †        |
|          | Unc5c      | Young: n=225 vs. Aged: n=129 | Wilcoxon rank-sum test | Young vs. Aged | 0.0422   | *        |

**fig. S6**

| Panel    | Group size                | Statistic method       | Comparison     | Data          | P value  |
|----------|---------------------------|------------------------|----------------|---------------|----------|
| fig. S6D | Young: n=170 Aged: n =165 | Wilcoxon rank-sum test | Young vs. Aged | Hcrt          | 3.87E-49 |
|          |                           |                        |                | 6330403K07Rik | 6.39E-20 |
|          |                           |                        |                | Zfp804b       | 1.05E-17 |
|          |                           |                        |                | Ndn           | 1.26E-17 |
|          |                           |                        |                | Nnat          | 4.08E-17 |
|          |                           |                        |                | Ubb           | 8.27E-14 |
|          |                           |                        |                | Cdh20         | 3.97E-11 |
|          |                           |                        |                | Oxr1          | 4.51E-11 |
|          |                           |                        |                | Itm2b         | 6.47E-11 |
|          |                           |                        |                | Pcsk1n        | 1.18E-10 |
|          |                           |                        |                | Fth1          | 1.45E-10 |
|          |                           |                        |                | Ptpn5         | 1.50E-10 |
|          |                           |                        |                | Ppia          | 1.66E-10 |
|          |                           |                        |                | Fstl5         | 2.84E-10 |
|          |                           |                        |                | Grid2         | 3.75E-10 |
|          |                           |                        |                | Nenf          | 4.60E-10 |
|          |                           |                        |                | Erc2          | 5.13E-10 |
|          |                           |                        |                | Gm42418       | 7.57E-10 |
|          |                           |                        |                | C030034L19Rik | 9.35E-10 |
|          |                           |                        |                | Dlgap1        | 1.20E-09 |
|          |                           |                        |                | Gnas          | 1.27E-09 |
|          |                           |                        |                | Tox           | 1.31E-09 |
|          |                           |                        |                | Wipf3         | 6.52E-09 |
|          |                           |                        |                | Gucyl1a2      | 7.77E-09 |
|          |                           |                        |                | Stmn3         | 8.34E-09 |
|          |                           |                        |                | Arhgap26      | 1.72E-08 |
|          |                           |                        |                | Cst3          | 1.87E-08 |
|          |                           |                        |                | RP23-407N2.2  | 2.41E-08 |
|          |                           |                        |                | Tmem114       | 2.91E-08 |
|          |                           |                        |                | Mical2        | 3.67E-08 |
|          |                           |                        |                | Atp1a3        | 3.72E-08 |
|          |                           |                        |                | Map3k4        | 5.08E-08 |
|          |                           |                        |                | Gm9843        | 9.37E-08 |
|          |                           |                        |                | Nbea          | 9.39E-08 |
| Magi3    | 1.02E-07                  |                        |                |               |          |
| Ank3     | 1.68E-07                  |                        |                |               |          |
| Dok5     | 1.92E-07                  |                        |                |               |          |
| Sema6a   | 2.15E-07                  |                        |                |               |          |
| Ghr      | 2.42E-07                  |                        |                |               |          |
| Ralgapa2 | 2.50E-07                  |                        |                |               |          |
| Bsg      | 2.55E-07                  |                        |                |               |          |
| Htr2c    | 3.40E-07                  |                        |                |               |          |
| Dab1     | 3.52E-07                  |                        |                |               |          |
| Cacna1a  | 4.07E-07                  |                        |                |               |          |
| C1ql3    | 4.57E-07                  |                        |                |               |          |
| Pcp4     | 6.50E-07                  |                        |                |               |          |
| Smyd4    | 6.92E-07                  |                        |                |               |          |



|  |  |  |  |               |          |
|--|--|--|--|---------------|----------|
|  |  |  |  | Trpc7         | 1.00E-06 |
|  |  |  |  | Cfap77        | 1.18E-06 |
|  |  |  |  | PISD          | 1.25E-06 |
|  |  |  |  | Slc25a48      | 1.32E-06 |
|  |  |  |  | Cox8a         | 1.35E-06 |
|  |  |  |  | Uchl1         | 1.57E-06 |
|  |  |  |  | Rasgrf2       | 1.61E-06 |
|  |  |  |  | Epha5         | 1.71E-06 |
|  |  |  |  | 9530052E02Rik | 1.76E-06 |
|  |  |  |  | Tanc2         | 1.77E-06 |
|  |  |  |  | Dnah9         | 1.78E-06 |
|  |  |  |  | Arhgap39      | 1.79E-06 |
|  |  |  |  | 2900026A02Rik | 2.07E-06 |
|  |  |  |  | Vwc21         | 2.65E-06 |
|  |  |  |  | Mkl2          | 2.89E-06 |
|  |  |  |  | Lrp1b         | 3.02E-06 |
|  |  |  |  | Adck4         | 3.02E-06 |

fig. S7

| Panel                         | Data                  | Group size     | Statistic method                       | Comparison           | P value | Notation | F/t statistic          |
|-------------------------------|-----------------------|----------------|----------------------------------------|----------------------|---------|----------|------------------------|
| fig. S7A Week1 top panel 1    | Wake amount/2h        | n=5 each group | Two-way RM ANOVA, Post-hoc Šidák       | Main effect of group | 0.6959  | ns       | $F_{(1, 8)}=0.1642$    |
| fig. S7A Week1 top panel 2    | Wake bout count/2h    | n=5 each group | Two-way RM ANOVA, Post-hoc Šidák       | Main effect of group | 0.9533  | ns       | $F_{(1, 8)}=0.003655$  |
| fig. S7A Week1 top panel 3    | Mean wake bout length | n=5 each group | Two-way RM ANOVA, Post-hoc Šidák       | Main effect of group | 0.8158  | ns       | $F_{(1, 8)}=0.05769$   |
| fig. S7A Week1 top panel 4    | Mean wake bout length | n=5 each group | Holm-Šidák                             | 48 hour              | 0.8152  | ns       | $t=0.2415$             |
|                               |                       |                |                                        | Light                | 0.2665  | ns       | $t=1.194$              |
|                               |                       |                |                                        | Dark                 | 0.5826  | ns       | $t=0.5726$             |
| fig. S7A Week1 middle panel 1 | NREM amount/2h        | n=5 each group | Two-way RM ANOVA, Post-hoc Šidák       | Main effect of group | 0.8085  | ns       | $F_{(1, 8)}=0.06274$   |
| fig. S7A Week1 middle panel 2 | NREM bout count/2h    | n=5 each group | Two-way RM ANOVA, Post-hoc Šidák       | Main effect of group | 0.9888  | ns       | $F_{(1, 8)}=0.0002100$ |
| fig. S7A Week1 middle panel 3 | Mean NREM bout length | n=5 each group | Two-way RM ANOVA, Post-hoc Šidák       | Main effect of group | 0.5359  | ns       | $F_{(1, 8)}=0.4182$    |
| fig. S7A Week1 middle panel 4 | Mean NREM bout length | n=5 each group | Holm-Šidák                             | 48 hour              | 0.6624  | ns       | $t=0.4532$             |
|                               |                       |                |                                        | Light                | 0.8018  | ns       | $t=0.2594$             |
|                               |                       |                |                                        | Dark                 | 0.7870  | ns       | $t=0.2794$             |
| fig. S7A Week1 bottom panel 1 | REM amount/2h         | n=5 each group | Two-way RM ANOVA, Post-hoc Šidák       | Main effect of group | 0.5871  | ns       | $F_{(1, 8)}=0.3200$    |
| fig. S7A Week1 bottom panel 2 | REM bout count/2h     | n=5 each group | Two-way RM ANOVA, Post-hoc Šidák       | Main effect of group | 0.5325  | ns       | $F_{(1, 8)}=0.4255$    |
| fig. S7A Week1 bottom panel 3 | Mean REM bout length  | n=5 each group | Two-way RM ANOVA, not applicable (N/A) | Main effect of group | N/A     | N/A      | N/A                    |
| fig. S7A Week1 bottom panel 4 | Mean REM bout length  | n=5 each group | Holm-Šidák                             | 48 hour              | 0.8666  | ns       | $t=0.1734$             |
|                               |                       |                |                                        | Light                | 0.8800  | ns       | $t=0.1558$             |
|                               |                       |                |                                        | Dark                 | 0.5272  | ns       | $t=0.6609$             |
| fig. S7A Week12 top panel 1   | Wake amount/2h        | n=5 each group | Two-way RM ANOVA, Post-hoc Šidák       | Main effect of group | 0.6404  | ns       | $F_{(1, 8)}=0.2357$    |
| fig. S7A Week12 top panel 2   | Wake bout count/2h    | n=5 each group | Two-way RM ANOVA, Post-hoc Šidák       | Main effect of group | 0.0223  | *        | $F_{(1, 8)}=7.986$     |
| fig. S7A Week12 top panel 3   | Mean wake bout length | n=5 each group | Two-way RM ANOVA, Post-hoc Šidák       | Main effect of group | 0.0538  | ns       | $F_{(1, 8)}=5.102$     |
| fig. S7A Week12 top panel 4   | Mean wake bout length | n=5 each group | Holm-Šidák                             | 48 hour              | 0.08493 | ns       | $t=1.966$              |
|                               |                       |                |                                        | Light                | 0.2016  | ns       | $t=1.391$              |
|                               |                       |                |                                        | Dark                 | 0.06666 | ns       | $t=2.122$              |

|                                |                                      |                                 |                                  |                         |          |    |                     |
|--------------------------------|--------------------------------------|---------------------------------|----------------------------------|-------------------------|----------|----|---------------------|
| fig. S7A Week12 middle panel 1 | NREM amount/2h                       | n=5 each group                  | Two-way RM ANOVA, Post-hoc Šidák | Main effect of group    | 0.9113   | ns | $F_{(1,8)}=0.01323$ |
| fig. S7A Week12 middle panel 2 | NREM bout count/2h                   | n=5 each group                  | Two-way RM ANOVA, Post-hoc Šidák | Main effect of group    | 0.0243   | *  | $F_{(1,8)}=7.672$   |
| fig. S7A Week12 middle panel 3 | Mean NREM bout length                | n=5 each group                  | Two-way RM ANOVA, Post-hoc Šidák | Main effect of group    | 0.0126   | *  | $F_{(1,8)}=10.24$   |
| fig. S7A Week12 middle panel 4 | Mean NREM bout length                | n=5 each group                  | Holm-Šidák                       | 48 hour                 | 0.009404 | ** | t=3.397             |
|                                |                                      |                                 |                                  | Light                   | 0.005076 | ** | t=3.822             |
|                                |                                      |                                 |                                  | Dark                    | 0.035939 | *  | t=2.518             |
| fig. S7A Week12 bottom panel 1 | REM amount/2h                        | n=5 each group                  | Two-way RM ANOVA, Post-hoc Šidák | Main effect of group    | 0.0121   | *  | $F_{(1,8)}=10.43$   |
| fig. S7A Week12 bottom panel 2 | REM bout count/2h                    | n=5 each group                  | Two-way RM ANOVA, Post-hoc Šidák | Main effect of group    | 0.0241   | *  | $F_{(1,8)}=7.709$   |
| fig. S7A Week12 bottom panel 3 | Mean REM bout length                 | n=5 each group                  | Two-way RM ANOVA, Post-hoc Šidák | Main effect of group    | 0.0706   | ns | $F_{(1,8)}=4.345$   |
| fig. S7A Week12 bottom panel 4 | Mean REM bout length                 | n=5 each group                  | Holm-Šidák                       | 48 hour                 | 0.1164   | ns | t=1.760             |
|                                |                                      |                                 |                                  | Light                   | 0.1115   | ns | t=1.788             |
|                                |                                      |                                 |                                  | Dark                    | 0.2575   | ns | t=1.219             |
| fig. S7C                       | RMP                                  | sgControl: 33 vs. sgKcnq2/3: 22 | Mann-Whitney <i>U</i> test       | sgControl vs. sgKcnq2/3 | 0.0142   | *  | N/A                 |
| fig. S7F top panel 1           | RMP                                  | n=15 each group                 | Mann-Whitney <i>U</i> test       | sgControl vs. sgKcnq2/3 | 0.0367   | *  | N/A                 |
| fig. S7F top panel 2           | Firing threshold                     | n=15 each group                 | Mann-Whitney <i>U</i> test       | sgControl vs. sgKcnq2/3 | 0.0169   | *  | N/A                 |
| fig. S7F top panel 3           | Difference between RMP and threshold | n=15 each group                 | Mann-Whitney <i>U</i> test       | sgControl vs. sgKcnq2/3 | 0.9674   | ns | N/A                 |
| fig. S7F top panel 4           | Amplitude of AP                      | n=15 each group                 | Mann-Whitney <i>U</i> test       | sgControl vs. sgKcnq2/3 | 0.3892   | ns | N/A                 |
| fig. S7F bottom panel 1        | Risetime of AP                       | n=15 each group                 | Mann-Whitney <i>U</i> test       | sgControl vs. sgKcnq2/3 | 0.1485   | ns | N/A                 |
| fig. S7F bottom panel 2        | Half duration of AP                  | n=15 each group                 | Mann-Whitney <i>U</i> test       | sgControl vs. sgKcnq2/3 | 0.3669   | ns | N/A                 |
| fig. S7F bottom panel 3        | Max. rising slope                    | n=15 each group                 | Mann-Whitney <i>U</i> test       | sgControl vs. sgKcnq2/3 | 0.0425   | *  | N/A                 |
| fig. S7F bottom panel 4        | Max. decaying slope                  | n=15 each group                 | Mann-Whitney <i>U</i> test       | sgControl vs. sgKcnq2/3 | 0.2895   | ns | N/A                 |

fig. S8

| Panel    | Data                             | Group size | Statistic method                                | Comparison             | P value | Notation | t statistic |
|----------|----------------------------------|------------|-------------------------------------------------|------------------------|---------|----------|-------------|
| fig. S8B | Exploration of identical objects | n=9        | Unpaired <i>t</i> -test with Welch's correction | IO1 vs. IO2            | 0.6496  | ns       | t=0.4630    |
| fig. S8C | Exploration of familiar object   | n=9        | Unpaired <i>t</i> -test with Welch's correction | Vehicle vs. flupirtine | 0.04402 | *        | t=2.186     |
| fig. S8C | Exploration of novel object      | n=9        | Unpaired <i>t</i> -test with Welch's correction | Vehicle vs. flupirtine | 0.04402 | *        | t=2.186     |

fig. S9

| Panel               | Data              | Group size     | Statistic method                 | Comparison           | P value | Notation | F/q statistic       |
|---------------------|-------------------|----------------|----------------------------------|----------------------|---------|----------|---------------------|
| fig. S9C row 1 No.1 | Wake amount/h     | n=6 each group | Two-way RM ANOVA, Post-hoc Šidák | Main effect of group | 0.5683  | ns       | $F_{(1,10)}=0.3481$ |
| fig. S9C row 1 No.2 | Wake bout count/h | n=6 each group | Two-way RM ANOVA, Post-hoc Šidák | Main effect of group | 0.3136  | ns       | $F_{(1,10)}=1.126$  |

|                        |                                  |                |                                           |                      |         |     |                         |
|------------------------|----------------------------------|----------------|-------------------------------------------|----------------------|---------|-----|-------------------------|
| fig. S9C<br>row 1 No.3 | Mean wake bout length            | n=6 each group | Two-way RM ANOVA,<br>Post-hoc Šidák       | Main effect of group | 0.0242  | *   | $F_{(1, 10)} = 7.304$   |
| fig. S9C<br>row 1 No.4 | Total wake bout length           | n=6 each group | Holm-Šidák                                | 48 hour              | 0.8892  | ns  | t=0.1429                |
|                        |                                  |                |                                           | Light                | 0.4001  | ns  | t=0.8788                |
|                        |                                  |                |                                           | Dark                 | 0.4905  | ns  | t=0.7158                |
| fig. S9C<br>row 1 No.5 | Total wake bout count            | n=6 each group | Holm-Šidák                                | 48 hour              | 0.1534  | ns  | t=1.465                 |
|                        |                                  |                |                                           | Light                | 0.2926  | ns  | t=1.071                 |
|                        |                                  |                |                                           | Dark                 | 0.6966  | ns  | t=0.3936                |
| fig. S9C<br>row 1 No.6 | Mean wake bout length            | n=6 each group | Holm-Šidák                                | 48 hour              | 0.4665  | ns  | t=0.7570                |
|                        |                                  |                |                                           | Light                | 0.08281 | ns  | t=1.927                 |
|                        |                                  |                |                                           | Dark                 | 0.9675  | ns  | t=0.04182               |
| fig. S9C<br>row 2 No.1 | NREM amount/h                    | n=6 each group | Two-way RM ANOVA,<br>Post-hoc Šidák       | Main effect of group | 0.7640  | ns  | $F_{(1, 10)} = 0.09520$ |
| fig. S9C<br>row 2 No.2 | NREM bout count/h                | n=6 each group | Two-way RM ANOVA,<br>Post-hoc Šidák       | Main effect of group | 0.2682  | ns  | $F_{(1, 10)} = 1.375$   |
| fig. S9C<br>row 2 No.3 | Mean NREM bout length            | n=6 each group | Two-way RM ANOVA,<br>Post-hoc Šidák       | Main effect of group | 0.0544  | ns  | $F_{(1, 10)} = 4.743$   |
| fig. S9C<br>row 2 No.4 | Total NREM bout length           | n=6 each group | Holm-Šidák                                | 48 hour              | 0.7589  | ns  | t=0.3155                |
|                        |                                  |                |                                           | Light                | 0.3089  | ns  | t=1.072                 |
|                        |                                  |                |                                           | Dark                 | 0.3439  | ns  | t=0.9936                |
| fig. S9C<br>row 2 No.5 | Total NREM bout count            | n=6 each group | Holm-Šidák                                | 48 hour              | 0.2682  | ns  | t=1.172                 |
|                        |                                  |                |                                           | Light                | 0.1250  | ns  | t=1.674                 |
|                        |                                  |                |                                           | Dark                 | 0.6183  | ns  | t=0.5141                |
| fig. S9C<br>row 2 No.6 | Mean NREM bout length            | n=6 each group | Holm-Šidák                                | 48 hour              | 0.2572  | ns  | t=1.202                 |
|                        |                                  |                |                                           | Light                | 0.3534  | ns  | t=0.9732                |
|                        |                                  |                |                                           | Dark                 | 0.1443  | ns  | t=1.584                 |
| fig. S9C<br>row 3 No.1 | REM amount/h                     | n=6 each group | Two-way RM ANOVA,<br>Post-hoc Šidák       | Main effect of group | 0.7683  | ns  | $F_{(1, 10)} = 0.09161$ |
| fig. S9C<br>row 3 No.2 | REM bout count/h                 | n=6 each group | Two-way RM ANOVA,<br>Post-hoc Šidák       | Main effect of group | 0.2481  | ns  | $F_{(1, 10)} = 1.505$   |
| fig. S9C<br>row 3 No.3 | Mean REM bout length             | n=6 each group | Two-way RM ANOVA,<br>Post-hoc Šidák       | Main effect of group | 0.0170  | *   | $F_{(1, 10)} = 8.170$   |
| fig. S9C<br>row 3 No.4 | Total REM bout length            | n=6 each group | Holm-Šidák                                | 48 hour              | 0.7699  | ns  | t=0.3005                |
|                        |                                  |                |                                           | Light                | 0.9216  | ns  | t=0.1009                |
|                        |                                  |                |                                           | Dark                 | 0.4326  | ns  | t=0.8176                |
| fig. S9C<br>row 3 No.5 | Total REM bout count             | n=6 each group | Holm-Šidák                                | 48 hour              | 0.2480  | ns  | t=1.227                 |
|                        |                                  |                |                                           | Light                | 0.3382  | ns  | t=1.006                 |
|                        |                                  |                |                                           | Dark                 | 0.5212  | ns  | t=0.6648                |
| fig. S9C<br>row 3 No.6 | Mean REM bout length             | n=6 each group | Holm-Šidák                                | 48 hour              | 0.01386 | *   | t=2.978                 |
|                        |                                  |                |                                           | Light                | 0.02968 | *   | t=2.534                 |
|                        |                                  |                |                                           | Dark                 | 0.04045 | *   | t=2.353                 |
| fig. S9C<br>row 4 No.1 | Cataplexy-like amount/h          | n=6 each group | Two-way RM ANOVA,<br>Post-hoc Šidák       | Main effect of group | 0.1464  | ns  | $F_{(1, 10)} = 2.480$   |
| fig. S9C<br>row 4 No.2 | Cataplexy-like bout count/h      | n=6 each group | Two-way RM ANOVA,<br>Post-hoc Šidák       | Main effect of group | 0.1114  | ns  | $F_{(1, 10)} = 3.049$   |
| fig. S9C<br>row 4 No.3 | Mean cataplexy-like bout length  | n=6 each group | Two-way RM ANOVA,<br>Not applicable (N/A) | Main effect of group | N/A     | N/A | N/A                     |
| fig. S9C<br>row 4 No.4 | Total cataplexy-like bout length | n=6 each group | Holm-Šidák                                | 24 hour              | 0.1464  | ns  | t=1.575                 |
|                        |                                  |                |                                           | Light                | N/A     | N/A | N/A                     |
|                        |                                  |                |                                           | Dark                 | 0.1464  | ns  | t=1.575                 |
| fig. S9C<br>row 4 No.5 | Total cataplexy-like bout count  | n=6 each group | Holm-Šidák                                | 24 hour              | 0.1114  | ns  | t=1.746                 |
|                        |                                  |                |                                           | Light                | N/A     | N/A | N/A                     |
|                        |                                  |                |                                           | Dark                 | 0.1114  | ns  | t=1.746                 |
| fig. S9C<br>row 4 No.6 | Mean cataplexy-like bout length  | n=6 each group | Holm-Šidák                                | 24 hour              | N/A     | N/A | N/A                     |
|                        |                                  |                |                                           | Light                | N/A     | N/A | N/A                     |
|                        |                                  |                |                                           | Dark                 | N/A     | N/A | N/A                     |

|                  |                                      |                                               |                            |                                  |        |    |     |
|------------------|--------------------------------------|-----------------------------------------------|----------------------------|----------------------------------|--------|----|-----|
| fig. S9G panel 1 | RMP                                  | Control: n=17 vs. ataxin3 <sup>+</sup> : n=21 | Mann-Whitney <i>U</i> test | Control vs. ataxin3 <sup>+</sup> | 0.0179 | *  | N/A |
| fig. S9G panel 2 | Firing threshold                     | Control: n=17 vs. ataxin3 <sup>+</sup> : n=21 | Mann-Whitney <i>U</i> test | Control vs. ataxin3 <sup>+</sup> | 0.1673 | ns | N/A |
| fig. S9G panel 3 | Difference between RMP and threshold | Control: n=17 vs. ataxin3 <sup>+</sup> : n=21 | Mann-Whitney <i>U</i> test | Control vs. ataxin3 <sup>+</sup> | 0.0161 | *  | N/A |
| fig. S9G panel 4 | Amplitude of AP                      | Control: n=17 vs. ataxin3 <sup>+</sup> : n=21 | Mann-Whitney <i>U</i> test | Control vs. ataxin3 <sup>+</sup> | 0.6217 | ns | N/A |
| fig. S9G panel 5 | Risetime of AP                       | Control: n=17 vs. ataxin3 <sup>+</sup> : n=21 | Mann-Whitney <i>U</i> test | Control vs. ataxin3 <sup>+</sup> | 0.7717 | ns | N/A |
| fig. S9G panel 6 | Half duration of AP                  | Control: n=17 vs. ataxin3 <sup>+</sup> : n=21 | Mann-Whitney <i>U</i> test | Control vs. ataxin3 <sup>+</sup> | 0.3990 | ns | N/A |
| fig. S9G panel 7 | Max. rising slope                    | Control: n=17 vs. ataxin3 <sup>+</sup> : n=21 | Mann-Whitney <i>U</i> test | Control vs. ataxin3 <sup>+</sup> | 0.9307 | ns | N/A |
| fig. S9G panel 8 | Max. decaying slope                  | Control: n=17 vs. ataxin3 <sup>+</sup> : n=21 | Mann-Whitney <i>U</i> test | Control vs. ataxin3 <sup>+</sup> | 0.2943 | ns | N/A |

fig. S10

| Panel                | Data                   | Group size     | Statistic method                       | Comparison           | <i>P</i> value | Notation | F/q statistic                |
|----------------------|------------------------|----------------|----------------------------------------|----------------------|----------------|----------|------------------------------|
| fig. S10A row 1 No.1 | Wake amount/h          | n=6 each group | Two-way RM ANOVA, Post-hoc Šidák       | Main effect of group | 0.0875         | ns       | F <sub>(1, 10)</sub> =3.587  |
| Fig. S10A row 1 No.2 | Wake bout count/h      | n=6 each group | Two-way RM ANOVA, Post-hoc Šidák       | Main effect of group | 0.0006         | ****     | F <sub>(1, 10)</sub> =24.30  |
| fig. S10A row 1 No.3 | Mean wake bout length  | n=6 each group | Two-way RM ANOVA, Post-hoc Šidák       | Main effect of group | 0.0021         | ***      | F <sub>(1, 10)</sub> =16.95  |
| fig. S10A row 1 No.4 | Total wake bout length | n=6 each group | Holm-Šidák                             | 24 hour              | 0.08632        | ns       | t=1.902                      |
|                      |                        |                |                                        | Light                | 0.1123         | ns       | t=1.741                      |
|                      |                        |                |                                        | Dark                 | 0.004660       | ***      | t=3.624                      |
| fig. S10A row 1 No.5 | Total wake bout count  | n=6 each group | Holm-Šidák                             | 24 hour              | <0.0001        | †        | t=6.691                      |
|                      |                        |                |                                        | Light                | 0.1597         | ns       | t=1.442                      |
|                      |                        |                |                                        | Dark                 | <0.0001        | †        | t=5.249                      |
| fig. S10A row 1 No.6 | Mean wake bout length  | n=6 each group | Holm-Šidák                             | 24 hour              | 0.005495       | **       | t=3.525                      |
|                      |                        |                |                                        | Light                | 0.6216         | ns       | t=0.5092                     |
|                      |                        |                |                                        | Dark                 | 0.008482       | **       | t=4.695                      |
| fig. S10A row 2 No.1 | NREM amount/h          | n=6 each group | Two-way RM ANOVA, Post-hoc Šidák       | Main effect of group | 0.2200         | ns       | F <sub>(1, 10)</sub> =1.712  |
| fig. S10A row 2 No.2 | NREM bout count/h      | n=6 each group | Two-way RM ANOVA, Post-hoc Šidák       | Main effect of group | 0.0013         | ***      | F <sub>(1, 10)</sub> =19.59  |
| fig. S10A row 2 No.3 | Mean NREM bout length  | n=6 each group | Two-way RM ANOVA, Post-hoc Šidák       | Main effect of group | 0.0021         | ***      | F <sub>(1, 10)</sub> =16.95  |
| fig. S10A row 2 No.4 | Total NREM bout length | n=6 each group | Holm-Šidák                             | 24 hour              | 0.2218         | ns       | t=1.303                      |
|                      |                        |                |                                        | Light                | 0.1263         | ns       | t=1.668                      |
|                      |                        |                |                                        | Dark                 | 0.01681        | *        | t=2.865                      |
| fig. S10A row 2 No.5 | Total NREM bout count  | n=6 each group | Holm-Šidák                             | 24 hour              | 0.001282       | ***      | t=4.426                      |
|                      |                        |                |                                        | Light                | 0.08415        | ns       | t=1.918                      |
|                      |                        |                |                                        | Dark                 | 0.0001270      | †        | t=6.030                      |
| fig. S10A row 2 No.6 | Mean NREM bout length  | n=6 each group | Holm-Šidák                             | 24 hour              | 0.0002890      | †        | t=5.430                      |
|                      |                        |                |                                        | Light                | 0.006460       | **       | t=3.428                      |
|                      |                        |                |                                        | Dark                 | <0.0001        | †        | t=7.276                      |
| fig. S10A row 3 No.1 | REM amount/h           | n=6 each group | Two-way RM ANOVA, Post-hoc Šidák       | Main effect of group | 0.2523         | ns       | F <sub>(1, 10)</sub> =1.476  |
| fig. S10A row 3 No.2 | REM bout count/h       | n=6 each group | Two-way RM ANOVA, Post-hoc Šidák       | Main effect of group | 0.5637         | ns       | F <sub>(1, 10)</sub> =0.3566 |
| fig. S10A row 3 No.3 | Mean REM bout length   | n=6 each group | Two-way RM ANOVA, not applicable (N/A) | Main effect of group | N/A            | N/A      | N/A                          |
|                      |                        |                | Holm-Šidák                             | 24 hour              | 0.2539         | ns       | t=1.211                      |

|                         |                                  |                |                                        |                      |          |     |                             |
|-------------------------|----------------------------------|----------------|----------------------------------------|----------------------|----------|-----|-----------------------------|
| fig. S10A<br>row 3 No.4 | Total REM bout length            | n=6 each group |                                        | Light                | 0.2776   | ns  | t=1.148                     |
|                         |                                  |                |                                        | Dark                 | 0.01028  | *   | t=3.153                     |
| fig. S10A<br>row 3 No.5 | Total REM bout count             | n=6 each group | Holm-Šidák                             | 24 hour              | 0.5637   | ns  | t=0.5972                    |
|                         |                                  |                |                                        | Light                | 0.3619   | ns  | t=0.9555                    |
|                         |                                  |                |                                        | Dark                 | 0.04419  | *   | t=2.301                     |
|                         |                                  |                |                                        | 24 hour              | 0.4048   | ns  | t=0.8698                    |
| fig. S10A<br>row 3 No.6 | Mean REM bout length             | n=6 each group | Holm-Šidák                             | Light                | 0.9974   | ns  | t=0.003295                  |
|                         |                                  |                |                                        | Dark                 | 0.3372   | ns  | t=0.1673                    |
| fig. S10A<br>row 4 No.1 | Cataplexy-like amount/h          | n=6 each group | Two-way RM ANOVA, Post-hoc Šidák       | Main effect of group | 0.0026   | *** | F <sub>(1, 10)</sub> =15.85 |
| fig. S10A<br>row 4 No.2 | Cataplexy-like bout count/h      | n=6 each group | Two-way RM ANOVA, Post-hoc Šidák       | Main effect of group | 0.0026   | *** | F <sub>(1, 10)</sub> =15.85 |
| fig. S10A<br>row 4 No.3 | Mean cataplexy-like bout length  | n=6 each group | Two-way RM ANOVA, not applicable (N/A) | Main effect of group | N/A      | N/A | N/A                         |
| fig. S10A<br>row 4 No.4 | Total cataplexy-like bout length | n=6 each group | Holm-Šidák                             | 24 hour              | 0.002598 | *** | t=3.981                     |
|                         |                                  |                |                                        | Light                | 0.017725 | *   | t=2.834                     |
|                         |                                  |                |                                        | Dark                 | 0.002642 | *** | t=3.970                     |
| fig. S10A<br>row 4 No.5 | Total cataplexy-like bout count  | n=6 each group | Holm-Šidák                             | 24 hour              | 0.002595 | *** | t=3.981                     |
|                         |                                  |                |                                        | Light                | 0.07792  | ns  | t=1.964                     |
|                         |                                  |                |                                        | Dark                 | 0.001154 | *** | t=4.494                     |
| fig. S10A<br>row 4 No.6 | Mean cataplexy-like bout length  | n=6 each group | Holm-Šidák, not applicable (N/A)       | 24 hour              | N/A      | N/A | N/A                         |
|                         |                                  |                |                                        | Light                | N/A      | N/A | N/A                         |
|                         |                                  |                |                                        | Dark                 | N/A      | N/A | N/A                         |

**fig. S11**

| Panel     | Data                   | Group size | Statistic method                            | Comparison  | P value | Notation | F/t statistic                  |
|-----------|------------------------|------------|---------------------------------------------|-------------|---------|----------|--------------------------------|
| fig. S11A | Wake (%/h)             | n=9        | Two-way mixed effects model, Post-hoc Šidák | Time        | <0.0001 | †        | F <sub>(23, 368)</sub> =15.92  |
|           |                        |            |                                             | Treatment   | 0.0411  | *        | F <sub>(1, 16)</sub> =4.937    |
|           |                        |            |                                             | Interaction | 0.2936  | ns       | F <sub>(23, 368)</sub> =1.145  |
| fig. S11B | Wake bout count/h      | n=9        | Two-way mixed effects model, Post-hoc Šidák | Time        | 0.0002  | †        | F <sub>(23, 368)</sub> =3.916  |
|           |                        |            |                                             | Treatment   | 0.5886  | ns       | F <sub>(1, 16)</sub> =0.3046   |
|           |                        |            |                                             | Interaction | 0.5552  | ns       | F <sub>(23, 368)</sub> =0.9320 |
| fig. S11C | Mean wake bout length  | n=9        | Two-way mixed effects model, Post-hoc Šidák | Time        | 0.0512  | ns       | F <sub>(23, 368)</sub> =2.435  |
|           |                        |            |                                             | Treatment   | 0.4193  | ns       | F <sub>(1, 16)</sub> =0.6871   |
|           |                        |            |                                             | Interaction | 0.4699  | ns       | F <sub>(23, 368)</sub> =0.9957 |
| fig. S11D | Total wake bout length | n=9        | Holm-Šidák                                  | ZT 0-6      | 0.0418  | *        | t=2.213                        |
|           |                        |            |                                             | ZT 6-12     | 0.7239  | ns       | t=0.3595                       |
|           |                        |            |                                             | ZT 12-18    | 0.4814  | ns       | t=0.7209                       |
|           |                        |            |                                             | ZT 18-24    | 0.3274  | ns       | t=1.010                        |
| fig. S11E | Total wake bout count  | n=9        | Holm-Šidák                                  | ZT 0-6      | 0.4040  | ns       | t=0.8400                       |
|           |                        |            |                                             | ZT 6-12     | 0.9432  | ns       | t=0.07149                      |
|           |                        |            |                                             | ZT 12-18    | 0.3942  | ns       | t=0.8579                       |
|           |                        |            |                                             | ZT 18-24    | 0.3122  | ns       | t=1.019                        |
| fig. S11F | Mean wake bout length  | n=9        | Holm-Šidák                                  | ZT 0-6      | 0.04126 | *        | t=2.219                        |
|           |                        |            |                                             | ZT 6-12     | 0.9993  | ns       | t=0.0008554                    |
|           |                        |            |                                             | ZT 12-18    | 0.2896  | ns       | t=1.095                        |
|           |                        |            |                                             | ZT 18-24    | 0.2148  | ns       | t=1.292                        |
| fig. S11G | NREM (%/h)             | n=9        | Two-way mixed effects model, Post-hoc Šidák | Time        | <0.0001 | †        | F <sub>(23, 368)</sub> =16.68  |
|           |                        |            |                                             | Treatment   | 0.0910  | ns       | F <sub>(1, 16)</sub> =3.235    |
|           |                        |            |                                             | Interaction | 3.3135  | ns       | F <sub>(23, 368)</sub> =1.126  |
| fig. S11H | NREM bout count/h      | n=9        | Two-way mixed effects model, Post-hoc Šidák | Time        | <0.0001 | †        | F <sub>(23, 368)</sub> =4.706  |
|           |                        |            |                                             | Treatment   | 0.7341  | ns       | F <sub>(1, 16)</sub> =0.1195   |
|           |                        |            |                                             | Interaction | 0.7071  | ns       | F <sub>(23, 368)</sub> =0.8194 |
| fig. S11I | Mean NREM bout length  | n=9        | Two-way mixed effects model, Post-hoc Šidák | Time        | <0.0001 | †        | F <sub>(23, 363)</sub> =16.14  |
|           |                        |            |                                             | Treatment   | 0.0619  | ns       | F <sub>(1, 16)</sub> =4.030    |
|           |                        |            |                                             | Interaction | 0.0003  | †        | F <sub>(23, 363)</sub> =2.431  |
| fig. S11J |                        | n=9        | Holm-Šidák                                  | ZT 0-6      | 0.01823 | *        | t=2.629                        |

|           |                        |     |                                             |             |         |    |                        |
|-----------|------------------------|-----|---------------------------------------------|-------------|---------|----|------------------------|
|           | Total NREM bout length |     |                                             | ZT 6-12     | 0.7822  | ns | t=0.2811               |
|           |                        |     |                                             | ZT 12-18    | 0.4673  | ns | t=0.7445               |
|           |                        |     |                                             | ZT 18-24    | 0.3453  | ns | t=0.9724               |
| fig. S11K | Total NREM bout count  | n=9 | Holm-Šidák                                  | ZT 0-6      | 0.2736  | ns | t=1.134                |
|           |                        |     |                                             | ZT 6-12     | 0.9222  | ns | t=0.09915              |
|           |                        |     |                                             | ZT 12-18    | 0.2514  | ns | t=1.190                |
|           |                        |     |                                             | ZT 18-24    | 0.3508  | ns | t=0.9611               |
| fig. S11L | Mean NREM bout length  | n=9 | Holm-Šidák                                  | ZT 0-6      | 0.01018 | *  | t=2.912                |
|           |                        |     |                                             | ZT 6-12     | 0.6639  | ns | t=0.4427               |
|           |                        |     |                                             | ZT 12-18    | 0.6235  | ns | t=0.5005               |
|           |                        |     |                                             | ZT 18-24    | 0.7968  | ns | t=0.2618               |
| fig. S11M | REM (%/h)              | n=9 | Two-way mixed effects model, Post-hoc Šidák | Time        | <0.0001 | †  | $F_{(23, 368)}=9.096$  |
|           |                        |     |                                             | Treatment   | 0.9503  | ns | $F_{(1, 16)}=0.004001$ |
|           |                        |     |                                             | Interaction | 0.4001  | ns | $F_{(23, 368)}=1.051$  |
| fig. S11N | REM bout count/h       | n=9 | Two-way mixed effects model, Post-hoc Šidák | Time        | <0.0001 | †  | $F_{(23, 368)}=10.62$  |
|           |                        |     |                                             | Treatment   | 0.9723  | ns | $F_{(1, 16)}=0.001241$ |
|           |                        |     |                                             | Interaction | 0.0601  | ns | $F_{(23, 368)}=1.521$  |
| fig. S11O | Mean REM bout length   | n=9 | Two-way mixed effects model, Post-hoc Šidák | Time        | 0.0550  | ns | $F_{(23, 297)}=2.238$  |
|           |                        |     |                                             | Treatment   | 0.4222  | ns | $F_{(1, 16)}=0.6785$   |
|           |                        |     |                                             | Interaction | 0.8513  | ns | $F_{(23, 297)}=0.6941$ |
| fig. S11P | Total REM bout length  | n=9 | Holm-Šidák                                  | ZT 0-6      | 0.9005  | ns | t=0.1270               |
|           |                        |     |                                             | ZT 6-12     | 0.8062  | ns | t=0.2494               |
|           |                        |     |                                             | ZT 12-18    | 0.6815  | ns | t=0.4181               |
|           |                        |     |                                             | ZT 18-24    | 0.3431  | ns | t=0.9769               |
| fig. S11Q | Total REM bout count   | n=9 | Holm-Šidák                                  | ZT 0-6      | 0.9231  | ns | t=0.09806              |
|           |                        |     |                                             | ZT 6-12     | >0.9999 | ns | t=0                    |
|           |                        |     |                                             | ZT 12-18    | 0.3876  | ns | t=0.8883               |
|           |                        |     |                                             | ZT 18-24    | 0.3433  | ns | t=0.9766               |
| fig. S11R | Mean REM bout length   | n=9 | Holm-Šidák                                  | ZT 0-6      | 0.3786  | ns | t=0.9055               |
|           |                        |     |                                             | ZT 6-12     | 0.1846  | ns | t=1.386                |
|           |                        |     |                                             | ZT 12-18    | 0.09061 | ns | t=1.801                |
|           |                        |     |                                             | ZT 18-24    | 0.9345  | ns | t=0.08353              |

fig. S12

| Panel      | Data               | Group size               | Statistic method             | Comparison                        | P value  | Notation | F/t statistic         |
|------------|--------------------|--------------------------|------------------------------|-----------------------------------|----------|----------|-----------------------|
| fig. S12E  | LC NA neuron count | Young: n=6 vs. Aged: n=6 | Two-way ANOVA                | Anterior-posterior location (APL) | <0.0001  | †        | $F_{(31, 320)}=521.3$ |
|            |                    |                          |                              | Age                               | <0.0001  | †        | $F_{(1, 320)}=162.2$  |
|            |                    |                          |                              | Interaction                       | <0.0001  | †        | $F_{(31, 320)}=10.62$ |
|            |                    |                          | Šidák's multiple comparisons | APL -4.945                        | 0.9451   | ns       | t=0.07068             |
|            |                    |                          |                              | APL -4.980                        | 0.5883   | ns       | t=0.5592              |
|            |                    |                          |                              | APL -5.015                        | 0.02556  | *        | t=2.621               |
|            |                    |                          |                              | APL -5.050                        | 0.4425   | ns       | t=0.7996              |
|            |                    |                          |                              | APL -5.085                        | 0.4754   | ns       | t=0.7415              |
|            |                    |                          |                              | APL -5.120                        | 0.5415   | ns       | t=0.4800              |
|            |                    |                          |                              | APL -5.155                        | 0.8287   | ns       | t=0.2221              |
|            |                    |                          |                              | APL -5.190                        | 0.8366   | ns       | t=0.2118              |
|            |                    |                          |                              | APL -5.225                        | 0.000394 | †        | t=5.213               |
|            |                    |                          |                              | APL -5.260                        | 0.000287 | †        | t=5.435               |
|            |                    |                          |                              | APL -5.295                        | 0.000129 | †        | t=6.018               |
|            |                    |                          |                              | APL -5.330                        | <0.0001  | †        | t=11.09               |
|            |                    |                          |                              | APL -5.365                        | <0.0001  | †        | t=8.287               |
|            |                    |                          |                              | APL -5.400                        | <0.0001  | †        | t=9.613               |
|            |                    |                          |                              | APL -5.435                        | <0.0001  | †        | t=6.933               |
| APL -5.470 | 0.1133             | ns                       | t=1.736                      |                                   |          |          |                       |
| APL -5.505 | 0.1539             | ns                       | t=1.543                      |                                   |          |          |                       |
| APL -5.540 | 0.9929             | ns                       | t=0.009130                   |                                   |          |          |                       |

|                     |                       |                             |                         |                |          |      |           |
|---------------------|-----------------------|-----------------------------|-------------------------|----------------|----------|------|-----------|
|                     |                       |                             |                         | APL -5.575     | 0.7936   | ns   | t=0.2687  |
|                     |                       |                             |                         | APL -5.610     | 0.000790 | **** | t=4.741   |
|                     |                       |                             |                         | APL -5.645     | 0.04279  | *    | t=2.320   |
|                     |                       |                             |                         | APL -5.680     | 0.06848  | ns   | t=2.041   |
|                     |                       |                             |                         | APL -5.715     | 0.8040   | ns   | t=0.2549  |
|                     |                       |                             |                         | APL -5.750     | 0.9570   | ns   | t=0.05530 |
|                     |                       |                             |                         | APL -5.785     | 0.5344   | ns   | t=0.6434  |
|                     |                       |                             |                         | APL -5.820     | 0.01831  | *    | t=2.815   |
|                     |                       |                             |                         | APL -5.855     | 0.04419  | *    | t=2.301   |
|                     |                       |                             |                         | APL -5.890     | 0.4078   | ns   | t=0.8642  |
|                     |                       |                             |                         | APL -5.925     | 0.6317   | ns   | t=0.4944  |
|                     |                       |                             |                         | APL -5.960     | 0.0064   | **   | t=3.432   |
|                     |                       |                             |                         | APL -5.995     | 0.6867   | ns   | t=0.4152  |
|                     |                       |                             |                         | APL -6.030     | 0.9106   | ns   | t=0.1152  |
| fig. S12E.<br>Inset | LC NA<br>neuron count | Young: n=6 vs.<br>Aged: n=6 | Unpaired <i>t</i> -test | Young vs. Aged | <0.0001  | †    | t=6.654   |

fig. S13

| Panel        | Data                                                                                                               | Group size             | Statistic method           | Comparison condition | P value  | Notation | F/t statistic |
|--------------|--------------------------------------------------------------------------------------------------------------------|------------------------|----------------------------|----------------------|----------|----------|---------------|
| fig.<br>S13B | Latency for NREM-to-wake transition across stimulation parameters:<br>Young vs. Aged                               | n=8 mice<br>each group | Mann-Whitney <i>U</i> test | 1 mW, 1 Hz           | 0.04988  | *        | N/A           |
|              |                                                                                                                    |                        |                            | 1 mW, 5 Hz           | 0.00078  | ****     | N/A           |
|              |                                                                                                                    |                        |                            | 1 mW, 10 Hz          | 0.00777  | **       | N/A           |
|              |                                                                                                                    |                        |                            | 1 mW, 15 Hz          | 0.00218  | ***      | N/A           |
|              |                                                                                                                    |                        |                            | 1 mW, 20 Hz          | 0.18197  | ns       | N/A           |
|              |                                                                                                                    |                        |                            | 5 mW, 1 Hz           | 0.04988  | *        | N/A           |
|              |                                                                                                                    |                        |                            | 5 mW, 5 Hz           | 0.00078  | ****     | N/A           |
|              |                                                                                                                    |                        |                            | 5 mW, 10 Hz          | 0.00124  | ***      | N/A           |
|              |                                                                                                                    |                        |                            | 5 mW, 15 Hz          | 0.01585  | *        | N/A           |
|              |                                                                                                                    |                        |                            | 5 mW, 20 Hz          | 0.04600  | *        | N/A           |
|              |                                                                                                                    |                        |                            | 10 mW, 1 Hz          | 0.02580  | *        | N/A           |
|              |                                                                                                                    |                        |                            | 10 mW, 5 Hz          | 0.13629  | ns       | N/A           |
|              |                                                                                                                    |                        |                            | 10 mW, 10 Hz         | 0.07677  | ns       | N/A           |
|              |                                                                                                                    |                        |                            | 10 mW, 15 Hz         | 0.00124  | ***      | N/A           |
|              |                                                                                                                    |                        |                            | 10 mW, 20 Hz         | 0.39782  | ns       | N/A           |
|              |                                                                                                                    |                        |                            | 15 mW, 1 Hz          | 0.00295  | ***      | N/A           |
|              |                                                                                                                    |                        |                            | 15 mW, 5 Hz          | 0.03481  | *        | N/A           |
|              |                                                                                                                    |                        |                            | 15 mW, 10 Hz         | 0.00528  | **       | N/A           |
|              |                                                                                                                    |                        |                            | 15 mW, 15 Hz         | 0.39565  | ns       | N/A           |
|              |                                                                                                                    |                        |                            | 15 mW, 20 Hz         | 0.08516  | ns       | N/A           |
| 20 mW, 1 Hz  | 0.16659                                                                                                            | ns                     | N/A                        |                      |          |          |               |
| 20 mW, 5 Hz  | 0.00047                                                                                                            | †                      | N/A                        |                      |          |          |               |
| 20 mW, 10 Hz | 0.39689                                                                                                            | ns                     | N/A                        |                      |          |          |               |
| 20 mW, 15 Hz | 0.08702                                                                                                            | ns                     | N/A                        |                      |          |          |               |
| 20 mW, 20 Hz | 0.40124                                                                                                            | ns                     | N/A                        |                      |          |          |               |
| fig.<br>S13C | Data in panel B aggregated for individual animal                                                                   | n=8 mice<br>each group | Mann-Whitney <i>U</i> test | Young vs. Aged       | 0.0002   | †        | N/A           |
| fig.<br>S13E | Wake duration following optogenetic stimulation during NREM sleep across stimulation parameters:<br>Young vs. Aged | n=8 mice<br>each group | Mann-Whitney <i>U</i> test | 1 mW, 1 Hz           | >0.99999 | ns       | N/A           |
|              |                                                                                                                    |                        |                            | 1 mW, 5 Hz           | 0.01383  | *        | N/A           |
|              |                                                                                                                    |                        |                            | 1 mW, 10 Hz          | 0.00031  | †        | N/A           |
|              |                                                                                                                    |                        |                            | 1 mW, 15 Hz          | 0.00093  | ****     | N/A           |
|              |                                                                                                                    |                        |                            | 1 mW, 20 Hz          | 0.34079  | ns       | N/A           |
|              |                                                                                                                    |                        |                            | 5 mW, 1 Hz           | >0.99999 | ns       | N/A           |
|              |                                                                                                                    |                        |                            | 5 mW, 5 Hz           | 0.01632  | *        | N/A           |
|              |                                                                                                                    |                        |                            | 5 mW, 10 Hz          | 0.00078  | ****     | N/A           |
|              |                                                                                                                    |                        |                            | 5 mW, 15 Hz          | 0.09883  | ns       | N/A           |
| 5 mW, 20 Hz  | 0.02067                                                                                                            | *                      | N/A                        |                      |          |          |               |

|              |                                                                                                                |                     |                            |                |          |     |     |
|--------------|----------------------------------------------------------------------------------------------------------------|---------------------|----------------------------|----------------|----------|-----|-----|
|              |                                                                                                                |                     |                            | 10 mW, 1 Hz    | 0.44615  | ns  | N/A |
|              |                                                                                                                |                     |                            | 10 mW, 5 Hz    | 0.03465  | *   | N/A |
|              |                                                                                                                |                     |                            | 10 mW, 10 Hz   | 0.00699  | **  | N/A |
|              |                                                                                                                |                     |                            | 10 mW, 15 Hz   | 0.48967  | ns  | N/A |
|              |                                                                                                                |                     |                            | 10 mW, 20 Hz   | 0.00280  | *** | N/A |
|              |                                                                                                                |                     |                            | 15 mW, 1 Hz    | 0.08221  | ns  | N/A |
|              |                                                                                                                |                     |                            | 15 mW, 5 Hz    | 0.00047  | †   | N/A |
|              |                                                                                                                |                     |                            | 15 mW, 10 Hz   | 0.01150  | *   | N/A |
|              |                                                                                                                |                     |                            | 15 mW, 15 Hz   | 0.02331  | *   | N/A |
|              |                                                                                                                |                     |                            | 15 mW, 20 Hz   | 0.00016  | †   | N/A |
|              |                                                                                                                |                     |                            | 20 mW, 1 Hz    | 0.19612  | ns  | N/A |
|              |                                                                                                                |                     |                            | 20 mW, 5 Hz    | 0.02409  | *   | N/A |
|              |                                                                                                                |                     |                            | 20 mW, 10 Hz   | 0.18617  | ns  | N/A |
|              |                                                                                                                |                     |                            | 20 mW, 15 Hz   | 0.02238  | *   | N/A |
|              |                                                                                                                |                     |                            | 20 mW, 20 Hz   | 0.02564  | *   | N/A |
| fig. S13F    | Data in panel E aggregated for individual animal                                                               | n=8 mice each group | Mann-Whitney <i>U</i> test | Young vs. Aged | 0.0002   | †   | N/A |
| fig. S13H    | Latency for REM-to-wake transition across stimulation parameters: Young vs. Aged                               | n=8 mice each group | Mann-Whitney <i>U</i> test | 1 mW, 1 Hz     | 0.48718  | ns  | N/A |
|              |                                                                                                                |                     |                            | 1 mW, 5 Hz     | 0.00295  | *** | N/A |
|              |                                                                                                                |                     |                            | 1 mW, 10 Hz    | 0.87848  | ns  | N/A |
|              |                                                                                                                |                     |                            | 1 mW, 15 Hz    | 0.04584  | *   | N/A |
|              |                                                                                                                |                     |                            | 1 mW, 20 Hz    | 0.01166  | *   | N/A |
|              |                                                                                                                |                     |                            | 5 mW, 1 Hz     | 0.32820  | ns  | N/A |
|              |                                                                                                                |                     |                            | 5 mW, 5 Hz     | 0.00295  | *** | N/A |
|              |                                                                                                                |                     |                            | 5 mW, 10 Hz    | 0.00016  | †   | N/A |
|              |                                                                                                                |                     |                            | 5 mW, 15 Hz    | 0.00979  | **  | N/A |
|              |                                                                                                                |                     |                            | 5 mW, 20 Hz    | 0.22144  | ns  | N/A |
|              |                                                                                                                |                     |                            | 10 mW, 1 Hz    | 0.07786  | ns  | N/A |
|              |                                                                                                                |                     |                            | 10 mW, 5 Hz    | 0.00295  | *** | N/A |
|              |                                                                                                                |                     |                            | 10 mW, 10 Hz   | 0.00016  | †   | N/A |
|              |                                                                                                                |                     |                            | 10 mW, 15 Hz   | 0.26014  | ns  | N/A |
|              |                                                                                                                |                     |                            | 10 mW, 20 Hz   | 0.36504  | ns  | N/A |
|              |                                                                                                                |                     |                            | 15 mW, 1 Hz    | 0.16908  | ns  | N/A |
|              |                                                                                                                |                     |                            | 15 mW, 5 Hz    | 0.00435  | *** | N/A |
|              |                                                                                                                |                     |                            | 15 mW, 10 Hz   | 0.00016  | †   | N/A |
|              |                                                                                                                |                     |                            | 15 mW, 15 Hz   | 0.81834  | ns  | N/A |
|              |                                                                                                                |                     |                            | 15 mW, 20 Hz   | 0.01911  | *   | N/A |
| 20 mW, 1 Hz  | 0.31438                                                                                                        | ns                  | N/A                        |                |          |     |     |
| 20 mW, 5 Hz  | 0.00016                                                                                                        | †                   | N/A                        |                |          |     |     |
| 20 mW, 10 Hz | 0.66356                                                                                                        | ns                  | N/A                        |                |          |     |     |
| 20 mW, 15 Hz | 0.19223                                                                                                        | ns                  | N/A                        |                |          |     |     |
| 20 mW, 20 Hz | 0.19643                                                                                                        | ns                  | N/A                        |                |          |     |     |
| fig. S13I    | Data in panel H aggregated for individual animal                                                               | n=8 mice each group | Mann-Whitney <i>U</i> test | Young vs. Aged | 0.0002   | †   | N/A |
| fig. S13K    | Wake duration following optogenetic stimulation during REM sleep across stimulation parameters: Young vs. Aged | n=8 mice each group | Mann-Whitney <i>U</i> test | 1 mW, 1 Hz     | >0.99999 | ns  | N/A |
|              |                                                                                                                |                     |                            | 1 mW, 5 Hz     | 0.07692  | ns  | N/A |
|              |                                                                                                                |                     |                            | 1 mW, 10 Hz    | 0.92820  | ns  | N/A |
|              |                                                                                                                |                     |                            | 1 mW, 15 Hz    | 0.57576  | ns  | N/A |
|              |                                                                                                                |                     |                            | 1 mW, 20 Hz    | 0.02160  | *   | N/A |
|              |                                                                                                                |                     |                            | 5 mW, 1 Hz     | 0.46667  | ns  | N/A |
|              |                                                                                                                |                     |                            | 5 mW, 5 Hz     | 0.00140  | *** | N/A |
|              |                                                                                                                |                     |                            | 5 mW, 10 Hz    | 0.01181  | *   | N/A |
|              |                                                                                                                |                     |                            | 5 mW, 15 Hz    | 0.00155  | *** | N/A |
|              |                                                                                                                |                     |                            | 5 mW, 20 Hz    | 0.22378  | ns  | N/A |
|              |                                                                                                                |                     |                            | 10 mW, 1 Hz    | >0.99999 | ns  | N/A |



|           |                                                  |                     |                            |                |         |     |     |
|-----------|--------------------------------------------------|---------------------|----------------------------|----------------|---------|-----|-----|
|           |                                                  |                     |                            | 10 mW, 5 Hz    | 0.01321 | *   | N/A |
|           |                                                  |                     |                            | 10 mW, 10 Hz   | 0.04087 | *   | N/A |
|           |                                                  |                     |                            | 10 mW, 15 Hz   | 0.07817 | ns  | N/A |
|           |                                                  |                     |                            | 10 mW, 20 Hz   | 0.00186 | *** | N/A |
|           |                                                  |                     |                            | 15 mW, 1 Hz    | 0.07692 | ns  | N/A |
|           |                                                  |                     |                            | 15 mW, 5 Hz    | 0.66402 | ns  | N/A |
|           |                                                  |                     |                            | 15 mW, 10 Hz   | 0.03512 | *   | N/A |
|           |                                                  |                     |                            | 15 mW, 15 Hz   | 0.15229 | ns  | N/A |
|           |                                                  |                     |                            | 15 mW, 20 Hz   | 0.77576 | ns  | N/A |
|           |                                                  |                     |                            | 20 mW, 1 Hz    | 0.23077 | ns  | N/A |
|           |                                                  |                     |                            | 20 mW, 5 Hz    | 0.73908 | ns  | N/A |
|           |                                                  |                     |                            | 20 mW, 10 Hz   | 0.77669 | ns  | N/A |
|           |                                                  |                     |                            | 20 mW, 15 Hz   | 0.16892 | ns  | N/A |
|           |                                                  |                     |                            | 20 mW, 20 Hz   | 0.00295 | *** | N/A |
| fig. S13L | Data in panel K aggregated for individual animal | n=8 mice each group | Mann-Whitney <i>U</i> test | Young vs. Aged | 0.0003  | †   | N/A |

**fig. S14**

| Panel     | Data                             | Group size                 | Statistic method           | Comparison     | <i>P</i> value | Notation | F/t statistic |
|-----------|----------------------------------|----------------------------|----------------------------|----------------|----------------|----------|---------------|
| fig. S14D | LC NA resting membrane potential | Young: n=10 vs. Aged: n=13 | Mann-Whitney <i>U</i> test | Young vs. Aged | 0.0666         | ns       | N/A           |
